# Supplementary material
Source: publisher figshare collection journal article supplement (https://acs.figshare.com/ndownloader/files/9254965)

# Pd catalyzed regio- and stereo-selective C-nucleoside synthesis from unactivated uracils and pyranoid glycals

Faheem Rasool,<sup>†</sup> Debaraj Mukherjee\*<sup>\*,†</sup>

<sup>†</sup>Academy of Scientific and Innovative Research, Indian Institute of Integrative Medicine (CSIR), Jammu 180001, India

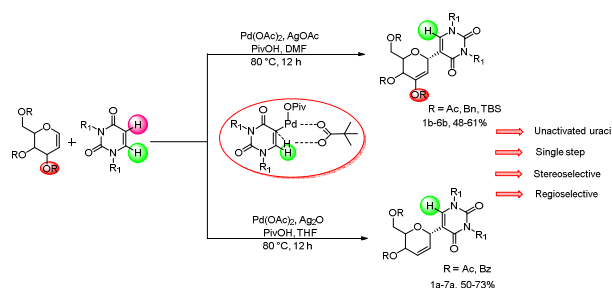

**General information:** All reactions were performed in a seal tube with teflon cap.  $^1\text{H}$  and  $^{13}\text{C}$  NMR spectra were recorded on 400 and 500 MHz spectrometers with TMS as internal standard. Chemical shifts are expressed in parts per million ( $\delta$  ppm). Signal multiplicities are represented by the following abbreviations: (s = singlet, d = doublet, t = triplet, q = quartet, m = multiplet, dd = double doublet), coupling constant ( $J$  values) in Hz and integration. Silica gel coated aluminium plates were used for TLC. The products were purified by column chromatography on silica gel (100-200 mesh) using petroleum ether–ethyl acetate as the eluent to obtain the pure products. Exact mass of all products were analysed by using HRMS having QTOF analyser. Reagents used were mostly purchased from Sigma Aldrich.

**Table1: Optimisation of  $\beta$ -C-nucleoside from glycal and 1,4-dibutyluracil<sup>a</sup>**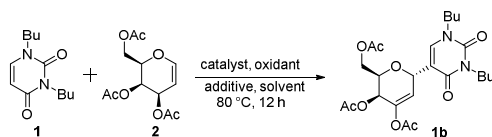

| entry          | catalyst                                           | oxidant                         | additive     | solvent    | temp (°C) | yield (%) |
|----------------|----------------------------------------------------|---------------------------------|--------------|------------|-----------|-----------|
| 1              | Pd(TFA) <sub>2</sub>                               | Ag <sub>2</sub> O               | PivOH        | DMF        | 80        | 23        |
| 2              | PdCl <sub>2</sub> (Ph <sub>3</sub> P) <sub>2</sub> | Ag <sub>2</sub> O               | PivOH        | DMF        | 80        | 35        |
| 3              | PdCl <sub>2</sub>                                  | Ag <sub>2</sub> O               | PivOH        | DMF        | 80        | 27        |
| <b>4</b>       | <b>Pd(OAc)<sub>2</sub></b>                         | <b>AgOAc</b>                    | <b>PivOH</b> | <b>DMF</b> | <b>80</b> | <b>57</b> |
| 5              | Pd(OAc) <sub>2</sub>                               | Ag <sub>2</sub> CO <sub>3</sub> | PivOH        | DMF        | 80        | 13        |
| 6 <sup>b</sup> | Pd(OAc) <sub>2</sub>                               | AgOAc                           | PivOH        | DMF        | 80        | 56        |

<sup>a</sup> in all cases **1** (1 equiv), **2** (2 equiv), oxidant (2 equiv), additive (2 equiv), and Pd(OAc)<sub>2</sub> (10 mol %) in solvent were taken in a sealed tube and heated for 12 h. <sup>b</sup> using **1** (1 equiv), **2** (2 equiv), oxidant (2 equiv), PivOH (3 equiv) and Pd(OAc)<sub>2</sub> (10 mol %) in DMF.

**General Procedure A for the Synthesis of Ferrier C-nucleosides (1a-7a):** To a 20 mL oven dried seal tube, 1,3-dialkyl uracil (1 mmol), glycal (2 mmol), silver oxide (2 mmol), pivalic acid (2 mmol), THF (5 mL), and palladium(II)acetate (0.1 mmol) were successively added. The reaction mixture was stirred at 80 °C for 12-16 hours. After the completion of the reaction as checked by the TLC, the reaction mixture was then cooled, diluted with EtOAc (5 mL), and filtered over Celite. The filter cake was washed with EtOAc (20 mL). The filtrate was then concentrated under reduced pressure and purified by flash chromatography (30–40% EtOAc in petroleum ether) on silica gel to provide products generally as colorless oil.

**General Procedure B for the Synthesis of  $\beta$ -hydride C-nucleosides (1b-6b):** To a 20 mL oven dried seal tube, 1,3-dialkyl uracil (1 mmol), glycal (2 mmol), silver acetate (2 mmol), pivalic acid (2 mmol), DMF (3 mL), and palladium(II)acetate (0.1 mmol) were successively added. The reaction mixture was stirred at 80 °C for 12-16 hours. After the completion of the reaction as checked by the TLC, the reaction mixture was then cooled, diluted with EtOAc (5 mL), and filtered over Celite. The filter cake was washed with EtOAc (20 mL). The filtrate was then concentrated under reduced pressure and purified by flash chromatography (30–40% EtOAc in petroleum ether) on silica gel to provide products generally as colorless oil.

## Characterization Data of Substrates:

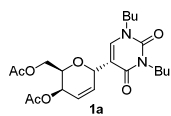

Prepared by the general procedure **A** using N,N-dibutyl uracil (224mg, 1mmol), tri-*O*-acetyl-D-galactal (544 mg, 2 mmol), Silver oxide (464 mg, 2mmol), Pivalic acid (226.67  $\mu$ L, 2mmol) and Pd(OAc)<sub>2</sub> (22.45 mg, 0.1 mmol) in THF (5mL) at 80 °C for 12 h and purified by flash chromatography (40% EtOAc/Petroleum ether) on silica gel (mesh size 100-200) to obtain **1a** in 73% (319mg) as a colorless oil.

**<sup>1</sup>H NMR (400 MHz, CDCl<sub>3</sub>)**  $\delta$  7.15 (d,  $J$  = 0.8 Hz, 1H), 6.30 (dd,  $J$  = 10.3, 2.6 Hz, 1H), 6.12-6.07 (m, 1H), 5.40 (s, 1H), 5.19 – 5.11 (m, 1H), 4.29 – 4.19 (m, 2H), 4.09 – 4.05 (m, 1H), 3.97 – 3.92 (m, 2H), 3.80 – 3.70 (m, 2H), 2.10 (s, 3H), 2.05 (s, 3H), 1.70 – 1.57 (m, 3H), 1.36 (dd,  $J$  = 15.0, 7.5 Hz, 4H), 1.25 (grease), 0.97 (t,  $J$  = 5.7 Hz, 3H), 0.93 (t,  $J$  = 5.7 Hz, 3H).

**<sup>13</sup>C NMR (101 MHz, CDCl<sub>3</sub>)**  $\delta$  170.48 (s), 170.47 (s), 161.94 (s), 151.03 (s), 139.84 (s), 131.83 (s), 123.56 (s), 110.21 (s), 68.90 (s), 68.18 (s), 63.76 (s), 62.72 (s), 49.87 (s), 41.38 (s), 31.15 (s), 29.66 (s), 20.84 (s), 20.71 (s), 20.21 (s), 19.76 (s), 13.70 (s), 13.59 (s).

**HRMS (ESI<sup>+</sup>):**  $m/z$  calcd for C<sub>22</sub>H<sub>33</sub>N<sub>2</sub>O<sub>7</sub> (M+H)<sup>+</sup> 437.2288, found 437.2280.

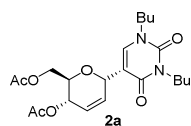

Prepared by the general procedure **A** using N,N-dibutyl uracil (50 mg, 0.223 mmol), tri-*O*-acetyl-D-glucal (121.4 mg, 0.446 mmol), Silver oxide (103.3, 0.446 mmol), Pivalic acid (50.5  $\mu$ L, 0.446 mmol) and Pd(OAc)<sub>2</sub> (5mg, 0.022 mmol) in THF (3 mL) at 80 °C for 12 h and purified by flash chromatography (40% EtOAc/Petroleum ether) on silica gel (mesh size 100-200) to obtain **2a** in 71% (69.0 mg) mg as a colorless oil.

**<sup>1</sup>H NMR (400 MHz, CDCl<sub>3</sub>)**  $\delta$  7.24 (d,  $J$  = 0.8 Hz, 1H), 6.15 (dd,  $J$  = 10.3, 2.6 Hz, 1H), 5.95-5.92 (m, 1H), 5.33 (d,  $J$  = 1.9 Hz, 1H), 5.17-5.15 (m, 1H), 4.26 (dd,  $J$  = 11.9, 6.7 Hz, 1H), 4.16 (dd,  $J$  = 11.9, 3.8 Hz, 1H), 3.98 – 3.91 (m, 3H), 3.78-3.73 (m, 2H), 2.08 (s, 3H),

2.07 (s, 3H), 1.71 – 1.65 (m, 2H), 1.62 – 1.55 (m, 2H), 1.39-1.33 (m, 4H), 1.25 (s, grease), 0.96 (t,  $J = 6.1$  Hz, 3H), 0.93 (t,  $J = 6.1$  Hz, 3H).

**$^{13}\text{C}$  NMR (101 MHz,  $\text{CDCl}_3$ )**  $\delta$  170.60 (s), 170.19 (s), 161.96 (s), 151.04 (s), 140.15 (s), 130.80 (s), 124.54 (s), 110.89 (s), 70.41 (s), 67.25 (s), 65.18 (s), 62.93 (s), 49.82 (s), 41.34 (s), 31.13 (s), 29.65 (s), 21.01 (s), 20.73 (s), 20.20 (s), 19.74 (s), 13.71 (s), 13.60 (s).

**HRMS ( $\text{ESI}^+$ ):**  $m/z$  calcd for  $\text{C}_{22}\text{H}_{33}\text{N}_2\text{O}_7$  ( $\text{M}+\text{H}$ ) $^+$  437.2288, found 437.2284.

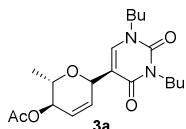

Prepared by the general procedure **A** using N,N-dibutyl uracil (50 mg, 0.223 mmol), di-*O*-acetyl-L-Rhamnal (95.4 mg, 0.446 mmol), Silver oxide (103.3, 0.446 mmol), Pivalic acid (50.5  $\mu\text{L}$ , 0.446 mmol) and  $\text{Pd}(\text{OAc})_2$  (5mg, 0.022 mmol) in THF (3 mL) at 80  $^\circ\text{C}$  for 12 h and purified by flash chromatography (30% EtOAc/Petroleum ether) on silica gel (mesh size 100-200) to obtain **3a** in 73% (61.5 mg) as a colorless oil.

**$^1\text{H}$  NMR (400 MHz,  $\text{CDCl}_3$ )**  $\delta$  7.22 (s, 1H), 6.12 – 6.08 (m, 1H), 5.92-5.89 (m, 1H), 5.29 (d,  $J = 1.6$  Hz, 1H), 4.94 – 4.88 (m, 1H), 3.95 (dd,  $J = 13.3, 6.5$  Hz, 3H), 3.77 – 3.73 (m, 2H), 2.09 (s, 3H), 1.68 (t,  $J = 7.5$  Hz, 2H), 1.62 – 1.56 (m, 2H), 1.38 (dd,  $J = 7.4, 1.9$  Hz, 2H), 1.35 (dd,  $J = 7.5, 1.9$  Hz, 2H), 1.30 (d,  $J = 6.6$  Hz, 3H), 0.96 (t,  $J = 5.1$  Hz, 3H), 0.93 (t,  $J = 5.1$  Hz, 3H).

**$^{13}\text{C}$  NMR (101 MHz,  $\text{CDCl}_3$ )**  $\delta$  170.52 (s), 162.14 (s), 151.08 (s), 140.11 (s), 131.76 (s), 123.31 (s), 111.60 (s), 69.53 (s), 69.20 (s), 65.37 (s), 49.78 (s), 41.33 (s), 31.13 (s), 29.65 (s), 21.18 (s), 20.22 (s), 19.74 (s), 16.60 (s), 13.73 (s), 13.61 (s).

**HRMS ( $\text{ESI}^+$ ):**  $m/z$  calcd for  $\text{C}_{20}\text{H}_{31}\text{N}_2\text{O}_5$  ( $\text{M}+\text{H}$ ) $^+$  379.2233, found 379.2231.

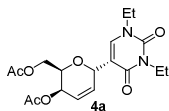

Prepared by the general procedure **A** using N,N-diethyl uracil (30 mg, 0.178 mmol), tri-*O*-acetyl-D-galactal (97.1 mg, 0.357 mmol), Silver oxide (82.7mg, 0.357 mmol), Pivalic acid (40.5  $\mu\text{L}$ , 0.357 mmol) and  $\text{Pd}(\text{OAc})_2$  (4mg, 0.017 mmol) in THF (3 mL) at 80  $^\circ\text{C}$  for 12 h

and purified by flash chromatography (40% EtOAc/Petroleum ether) on silica gel (mesh size 100-200) to obtain **4a** in 51% (34.4 mg) as a colorless oil.

**<sup>1</sup>H NMR (400 MHz, CDCl<sub>3</sub>)** δ 7.19 (d, *J* = 0.9 Hz, 1H), 6.32 (dd, *J* = 10.3, 3.2 Hz, 1H), 6.12-6.08(m, 1H), 5.41 (s, 1H), 5.18 – 5.12 (m, 1H), 4.30-4.19 (m, 2H), 4.10 – 4.06 (m, 1H), 4.05 – 3.99 (m, 2H), 3.83 (dt, *J* = 13.9, 6.8 Hz, 2H), 2.11 (s, 3H), 2.06 (s, 3H), 1.34 (t, *J* = 7.2 Hz, 3H), 1.22 (t, *J* = 7.2 Hz, 3H).

**<sup>13</sup>C NMR (101 MHz, CDCl<sub>3</sub>)** δ 170.53 (s), 170.51 (s), 161.81 (s), 157.22 (s), 139.43 (s), 131.82 (s), 123.57 (s), 110.52 (s), 68.88 (s), 68.19 (s), 63.75 (s), 62.69 (s), 45.08 (s), 36.63 (s), 29.69 (s), 20.86 (s), 20.74 (s), 14.41 (s), 12.80 (s).

**HRMS (ESI<sup>+</sup>):** *m/z* calcd for C<sub>18</sub>H<sub>25</sub>N<sub>2</sub>O<sub>7</sub> (M+H)<sup>+</sup> 381.1662, found 381.1664.

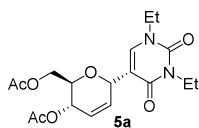

Prepared by the general procedure **A** using N,N-diethyl uracil (30 mg, 0.178 mmol), tri-*O*-acetyl-D-glucal (97.1 mg, 0.357 mmol), Silver oxide (82.7mg, 0.357 mmol), Pivalic acid (40.5 μL, 0.357 mmol) and Pd(OAc)<sub>2</sub> Pd(OAc)<sub>2</sub> (4mg, 0.017 mmol) in THF (3 mL) at 80 °C for 12 h and purified by flash chromatography (40% EtOAc/Petroleum ether) on silica gel (mesh size 100-200) to obtain **5a** in 51% (34.4 mg) as a colorless oil.

**<sup>1</sup>H NMR (400 MHz, CDCl<sub>3</sub>)** δ 7.25 (d, *J* = 0.9 Hz, 1H), δ 6.15-6.11 (m, 1H), 5.96 – 5.86 (m, 1H), 5.32 (d, *J* = 1.8 Hz, 1H), 5.14 (m, 1H), 4.28 – 4.22 (m, 1H), 4.15 (dd, *J* = 12.0, 3.8 Hz, 1H), 4.02 – 3.97 (m, 2H), 3.96 – 3.92 (m, 1H), 3.86 – 3.76 (m, 2H), 2.06 (s, 3H), 2.05 (s, 3H), 1.23 (bs, grease peak) 1.31 (t, *J* = 7.2 Hz, 3H), 1.19 (t, *J* = 7.1 Hz, 3H). 0.86-0.80 (m, grease peak)

**<sup>13</sup>C NMR (101 MHz, CDCl<sub>3</sub>)** δ 170.62 (s), 170.21 (s), 161.80 (s), 150.67 (s), 139.75 (s), 130.77 (s), 124.52 (s), 111.19 (s), 70.39 (s), 67.19 (s), 65.13 (s), 62.86 (s), 45.04 (s), 36.56 (s), 29.65 (s, grease peak) 21.00 (s), 20.72 (s), 14.38 (s), 12.77 (s).

**HRMS (ESI<sup>+</sup>):** *m/z* calcd for C<sub>18</sub>H<sub>25</sub>N<sub>2</sub>O<sub>7</sub> (M+H)<sup>+</sup> 381.1662, found 381.1659.

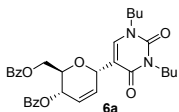

Prepared by the general procedure **A** using N,N-dibutyl uracil (50 mg, 0.223 mmol), tri-*O*-benzoyl-D-glucal (204.4 mg, 0.446 mmol), Silver oxide (103.3mg, 0.446 mmol), Pivalic acid (50.5  $\mu$ L, 0.446 mmol) and Pd(OAc)<sub>2</sub> (5mg, 0.022 mmol) in THF (3 mL) at 80 °C for 12 h and purified by flash chromatography (40% EtOAc/Petroleum ether) on silica gel (mesh size 100-200) to obtain **6a** in 64% (79.9 mg) as a colorless oil.

**<sup>1</sup>H NMR (400 MHz, CDCl<sub>3</sub>)**  $\delta$  8.06 – 7.98 (m, 4H), 7.59 – 7.52 (m, 2H), 7.40 (dd,  $J$  = 15.2, 7.6 Hz, 4H), 7.31 (s, 1H), 6.26 (ddd,  $J$  = 10.3, 2.6, 1.3 Hz, 1H), 6.27 – 6.25 (m, 1H), 5.52 (s, 1H), 5.54 – 5.48 (m, 1H), 5.46 (d,  $J$  = 1.8 Hz, 1H), 4.60 – 4.53 (m, 2H), 4.29 (dd,  $J$  = 10.8, 6.1 Hz, 1H), 3.97 – 3.89 (t,  $J$  = 7.4 Hz, 2H), 3.71 (t,  $J$  = 7.4 Hz, 2H), 1.63 – 1.57 (m, 4H), 1.39 – 1.29 (m, 4H), 0.96 – 0.93 (m, 3H), 0.93 – 0.90 (m, 3H).

**<sup>13</sup>C NMR (101 MHz, CDCl<sub>3</sub>)**  $\delta$  166.25 (s), 165.87 (s), 161.98 (s), 151.04 (s), 140.13 (s), 133.34 (s), 133.15 (s), 131.07 (s), 129.80 (s), 129.76 (s), 129.70 (s), 128.45 (s), 128.39 (s), 124.61 (s), 110.96 (s), 70.56 (s), 67.51 (s), 66.31 (s), 63.83 (s), 49.84 (s), 41.35 (s), 31.14 (s), 29.69 (s), 20.23 (s), 19.71 (s), 13.72 (s), 13.62 (s).

**HRMS (ESI<sup>+</sup>):**  $m/z$  calcd for C<sub>32</sub>H<sub>37</sub>N<sub>2</sub>O<sub>7</sub> (M+H)<sup>+</sup> 561.2601, found 561.2613.

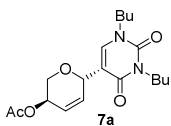

Prepared by the general procedure **A** using N,N-dibutyl uracil (50 mg, 0.223 mmol), di-*O*-acetyl-D-xylal (89.2 mg, 0.446 mmol), Silver oxide (103.3, 0.446 mmol), Pivalic acid (50.5  $\mu$ L, 0.446 mmol) and Pd(OAc)<sub>2</sub> (5mg, 0.022 mmol) in THF (3 mL) at 80 °C for 12 h and purified by flash chromatography (30% EtOAc/Petroleum ether) on silica gel (mesh size 100-200) to obtain **7a** in 50% (40.5 mg) as a colorless oil.

**<sup>1</sup>H NMR (400 MHz, CDCl<sub>3</sub>)**  $\delta$  7.26 (s, 1H), 6.19 (d,  $J$  = 10.2 Hz, 1H), 6.00 (t,  $J$  = 22.9 Hz, 1H), 5.14 (t,  $J$  = 37.6 Hz, 2H), 4.10 (d,  $J$  = 12.9 Hz, 1H), 2.09 (s, 3H), 1.69 – 1.64 (m, 2H), 1.61 – 1.56 (m, 2H), 1.36 (dd,  $J$  = 14.5, 7.2 Hz, 4H), 0.94 (dd,  $J$  = 15.9, 7.8 Hz, 6H).

**<sup>13</sup>C NMR (101 MHz, CDCl<sub>3</sub>)** δ 170.63 (s), 161.97 (s), 151.04 (s), 139.83 (s), 134.25 (s), 122.50 (s), 111.92 (s), 69.50 (s), 67.92 (s), 64.45 (s), 49.83 (s), 41.29 (s), 31.13 (s), 29.68 (s), 29.65 (s), 21.16 (s), 20.21 (s), 19.75 (s), 13.71 (s), 13.61 (s).

**HRMS (ESI<sup>+</sup>):** m/z calcd for C<sub>19</sub>H<sub>29</sub>N<sub>2</sub>O<sub>5</sub> (M+H)<sup>+</sup> 365.2076, found 365.2073.

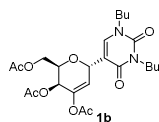

Prepared by the general procedure **B** using N,N-dibutyl uracil (224mg, 1mmol), tri-*O*-acetyl-D-galactal (544 mg, 2 mmol), Silver acetate (464 mg, 2mmol), Pivalic acid (226.7μL, 2 mmol) and Pd(OAc)<sub>2</sub> (22.4 mg, 0.1) in THF (5 mL) at 80 °C for 12 h and purified by flash chromatography (40% EtOAc/Petroleum ether) on silica gel (mesh size 100-200) to obtain **1b** in 59% (290.7 mg) as a colorless oil.

**<sup>1</sup>H NMR (400 MHz, CDCl<sub>3</sub>)** δ 7.35 (s, 1H), 5.83 (d, *J* = 3.7 Hz, 1H), 5.64 (d, *J* = 3.7 Hz, 1H), 5.35 (d, *J* = 2.5 Hz, 1H), 4.17 (s, 1H), 4.15 (s, 1H), 4.08 – 4.06 (m, 1H), 3.93 (t, *J* = 7.6 Hz, 2H), 3.76 (dd, *J* = 13.8, 6.9 Hz, 2H), 2.15 (s, 3H), 2.11 (s, 3H), 1.99 (s, 3H), 1.69 (dd, *J* = 7.4, 2.3 Hz, 2H), 1.61 – 1.58 (m, 2H), 1.38 – 1.32 (m, 4H), 1.25 (grease), 0.96 (t, *J* = 5.8 Hz, 3H), 0.92 (t, *J* = 5.8 Hz, 3H).

**<sup>13</sup>C NMR (101 MHz, CDCl<sub>3</sub>)** δ 170.44 (s), 170.25 (s), 169.79 (s), 161.92 (s), 151.02 (s), 144.25 (s), 141.64 (s), 119.35 (s), 108.70 (s), 68.46 (s), 67.86 (s), 63.86 (s), 61.94 (s), 49.90 (s), 41.44 (s), 30.93 (s), 29.63 (s), 20.63 (s), 20.57 (s), 20.19 (s), 19.67 (s), 13.69 (s), 13.53 (s).

**HRMS (ESI<sup>+</sup>):** m/z calcd for C<sub>24</sub>H<sub>35</sub>N<sub>2</sub>O<sub>9</sub> (M+H)<sup>+</sup> 495.2343, found 495.2347.

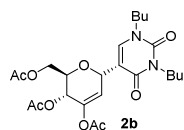

Prepared by the general procedure **B** using N,N-dibutyl uracil (50 mg, 0.223 mmol), tri-*O*-acetyl-D-glucal (121.4 mg, 0.446), Silver acetate (74.5 mg, 0.446 mmol), Pivalic acid (50.5 μL, 0.446 mmol) and Pd(OAc)<sub>2</sub> (5 mg, 0.022 mmol) in THF (3 mL) at 80 °C for 12 h and purified by flash chromatography (40% EtOAc/Petroleum ether) on silica gel (mesh size 100-200) to obtain **2b** in 56% (61.6 mg) as a colorless oil.

**$^1\text{H}$  NMR (400 MHz,  $\text{CDCl}_3$ )**  $\delta$  7.45 (s, 1H), 5.83 (d,  $J = 2.4$  Hz, 1H), 5.51 (s, 1H), 5.35 (d,  $J = 4.1$  Hz, 1H), 3.98 – 3.86 (m, 4H), 3.77 (t,  $J = 7.4$  Hz, 3H), 2.13 (s, 3H), 2.08 (s, 3H), 2.07 (s, 3H), 1.71 – 1.67 (t, 2H), 1.61-1.57 (t, 2H), 1.37 – 1.33 (m, 4H), 0.95 – 0.91 (m, 6H).

**$^{13}\text{C}$  NMR (101 MHz,  $\text{CDCl}_3$ )**  $\delta$  169.44 (s), 169.25 (s), 168.79 (s), 160.92 (s), 150.02 (s), 143.25 (s), 140.64 (s), 118.35 (s), 107.70 (s), 67.46 (s), 66.86 (s), 62.86 (s), 60.94 (s), 48.90 (s), 40.44 (s), 29.93 (s), 28.63 (s), 19.63 (s), 19.57 (s), 19.19 (s), 18.67 (s), 12.69 (s), 12.53 (s).

**HRMS ( $\text{ESI}^+$ ):**  $m/z$  calcd for  $\text{C}_{24}\text{H}_{35}\text{N}_2\text{O}_9(\text{M}+\text{H})^+$  495.2343, found 495.2345.

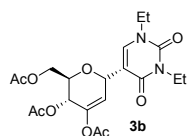

Prepared by the general procedure **B** using N,N-diethyl uracil (30 mg, 0.178 mmol), tri-*O*-acetyl-D-glucal (97.1 mg, 0.357 mmol), Silver acetate (59.6 mg, 0.357 mmol), Pivalic acid (40.5  $\mu\text{L}$ , 0.357 mmol) and  $\text{Pd}(\text{OAc})_2$  (4 mg, 0.017 mmol) in THF (3 mL) at 80  $^\circ\text{C}$  for 12 h and purified by flash chromatography (40% EtOAc/Petroleum ether) on silica gel (mesh size 100-200) to obtain **3b** in 48% (37.4 mg) as a colorless oil.

**$^1\text{H}$  NMR (500 MHz,  $\text{CDCl}_3$ )**  $\delta$  7.48 (s, 1H), 5.84 (s, 1H), 5.52 (s, 1H), 5.36 (s, 1H), 4.34 (d,  $J = 6.7$  Hz, 1H), 4.21 – 4.14 (m, 2H), 4.02 – 3.99 (m, 2H), 3.85-3.83 (m, 2H), 2.14 (s, 3H), 2.10 (s, 3H), 2.08 (s, 3H), 1.36-1.33 (m, 3H), 1.23-1.20 (m, 3H).

**$^{13}\text{C}$  NMR (126 MHz,  $\text{CDCl}_3$ )**  $\delta$  170.68 (s), 170.23 (s), 169.02 (s), 161.70 (s), 150.68 (s), 142.42 (s), 140.95 (s), 119.28 (s), 110.75 (s), 72.33 (s), 66.30 (s), 64.83 (s), 61.97 (s), 45.15 (s), 36.63 (s), 20.90 (s), 20.81 (s), 20.73 (s), 14.40 (s), 12.83 (s).

**HRMS ( $\text{ESI}^+$ ):**  $m/z$  calcd for  $\text{C}_{20}\text{H}_{27}\text{N}_2\text{O}_9(\text{M}+\text{H})^+$  439.1717, found 439.1719.

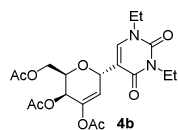

Prepared by the general procedure **B** using N,N-diethyl uracil (30 mg, 0.178 mmol), tri-*O*-acetyl-D-galactal (97.1 mg, 0.357 mmol), Silver acetate (59.6 mg, 0.357 mmol), Pivalic acid (40.5  $\mu\text{L}$ , 0.357 mmol) and  $\text{Pd}(\text{OAc})_2$  (4 mg, 0.017 mmol) in THF (3 mL) at 80  $^\circ\text{C}$  for 12 h

and purified by flash chromatography (40% EtOAc/Petroleum ether) on silica gel (mesh size 100-200) to obtain **3b** in 49% (38.2 mg) as a colorless oil.

**<sup>1</sup>H NMR (400 MHz, CDCl<sub>3</sub>)** δ 7.39 (s, 1H), 5.86 (d, *J* = 3.7 Hz, 1H), 5.66 (d, *J* = 3.6 Hz, 1H), 5.37 (d, *J* = 1.5 Hz, 1H), 4.19 (d, *J* = 6.6 Hz, 2H), 4.10 (t, *J* = 5.5 Hz, 1H), 4.02 (dd, *J* = 13.6, 6.7 Hz, 2H), 3.91 – 3.79 (m, 2H), 2.18 (s, 3H), 2.14 (s, 3H), 2.02 (s, 3H), 1.35-1.33 (m, 3H), 1.26-1.22 (m, 3H), 0.87 (m, grease).

**<sup>13</sup>C NMR (101 MHz, CDCl<sub>3</sub>)** δ 170.52 (s), 170.38 (s), 169.96 (s), 161.81 (s), 150.71 (s), 144.28 (s), 141.15 (s), 119.36 (s), 109.06 (s), 68.42 (s), 67.87 (s), 63.82 (s), 61.92 (s), 45.12 (s), 36.73 (s), 29.70 (s), 20.71 (s), 20.66 (s), 14.31 (s), 12.81 (s).

**HRMS (ESI<sup>+</sup>):** *m/z* calcd for C<sub>20</sub>H<sub>27</sub>N<sub>2</sub>O<sub>9</sub> (M+H)<sup>+</sup> 439.1717, found 439.1719.

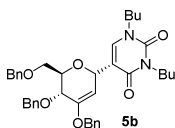

Prepared by the general procedure **A** using N,N-dibutyl uracil (50 mg, 0.223 mmol), tri-*O*-benzyl-D-glucal (121.4 mg, 0.446 mmol), Silver acetate (74.5 mg, 0.446 mmol), Pivalic acid (50.5 μL, 0.446 mmol) and Pd(OAc)<sub>2</sub> (5 mg, 0.017 mmol) in THF (3 mL) at 80 °C for 12 h and purified by flash chromatography (30% EtOAc/Petroleum ether) on silica gel (mesh size 100-200) to obtain **2b** in 61% (86.7 mg) as a colorless oil.

**<sup>1</sup>H NMR (400 MHz, CDCl<sub>3</sub>)** δ 7.38-7.36 (m, 4H), 7.33-7.31 (m, 4H), 7.30-7.28 (m, 5H), 7.26-7.24 (m, 3H), δ 5.40 (d, *J* = 1.5 Hz, 1H), 5.11 (d, *J* = 3.1 Hz, 1H), 4.87 – 4.80 (m, 3H), 4.64 (d, *J* = 11.5 Hz, 1H), 4.55 (bs, 2H), 4.13 (t, *J* = 5.4 Hz, 1H), 4.00 (d, *J* = 4.9 Hz, 1H), 3.97 – 3.92 (m, 2H), 3.67-3.58 (m, 4H), 1.63-1.59 (m, 7.8 Hz, 4H), 1.38 (dd, *J* = 15.0, 7.5 Hz, 2H), 1.30 – 1.25 (m, 2H), 0.94 (dd, *J* = 15.1, 7.3 Hz, 6H).

**<sup>13</sup>C NMR (101 MHz, CDCl<sub>3</sub>)** 162.33 (s), 152.47 (s), 151.14 (s), 140.16 (s), 138.30 (s), 138.03 (s), 136.76 (s), 128.48 (s), 128.41 (s), 128.32 (s), 128.10 (s), 127.88 (s), 127.84 (s), 127.74 (s), 127.71 (s), 127.37 (s), 112.72 (s), 98.15 (s), 74.28 (s), 73.55 (s), 73.20 (s), 71.75 (s), 69.06 (s), 69.02 (s), 66.88 (s), 49.69 (s), 41.24 (s), 31.08 (s), 29.69 (s), 20.26 (s), 19.71 (s), 13.76 (s), 13.63 (s).

**HRMS (ESI<sup>+</sup>):** *m/z* calcd for C<sub>39</sub>H<sub>47</sub>N<sub>2</sub>O<sub>6</sub> (M+H)<sup>+</sup> 639.3434, found 639.3439.

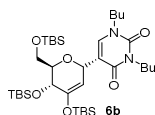

Prepared by the general procedure **B** using N,N-dibutyl uracil (50 mg, 0.223 mmol), tri-*O*-tert-butyldimethylsilyl-D-glucal (121.4 mg, 0.446 mmol), Silver acetate (74.5 mg, 0.446 mmol), Pivalic acid (50.5  $\mu$ L, 0.446 mmol) and Pd(OAc)<sub>2</sub> (5 mg, 0.017 mmol) in THF (3 mL) at 80 °C for 12 h and purified by flash chromatography (40% EtOAc/Petroleum ether) on silica gel (mesh size 100-200) to obtain **6b** in 52% (82.3 mg) as a colorless oil.

**<sup>1</sup>H NMR (400 MHz, CDCl<sub>3</sub>)**  $\delta$  7.36 (s, 1H), 5.27 (d, *J* = 1.2 Hz, 1H), 4.96 (d, *J* = 1.2 Hz, 1H), 4.02 (s, 1H), 3.96 – 3.90 (m, 3H), 3.77 – 3.68 (m, 4H), 1.67-1.57 (m, 5H), 1.40 – 1.30 (m, 5H), 1.26 (s, 2H), 0.95 (d, *J* = 2.8 Hz, 2H), 0.93 (s, 9H), 0.92 (s, 9H), 0.89 (s, 9H), 0.17 (d, *J* = 4.9 Hz, 6H), 0.12 (d, *J* = 3.6 Hz, 6H), 0.05 (s, 6H).

**<sup>13</sup>C NMR (101 MHz, CDCl<sub>3</sub>)**  $\delta$  162.21 (s), 151.14 (s), 148.21 (s), 140.51 (s), 114.11 (s), 104.99 (s), 79.93 (s), 67.25 (s), 65.80 (s), 62.08 (s), 49.70 (s), 41.17 (s), 31.13 (s), 29.68 (s), 25.91 (s), 25.89 (s), 25.85 (s), 20.20 (s), 19.78 (s), 18.29 (s), 18.21 (s), 18.07 (s), 13.73 (s), 13.59 (s), -4.14 (s), -4.18 (s), -4.64 (s), -5.42 (s), -5.50 (s).

**HRMS (ESI<sup>+</sup>):** *m/z* calcd for C<sub>36</sub>H<sub>71</sub>N<sub>2</sub>O<sub>6</sub>Si<sub>3</sub> (M+H)<sup>+</sup> 711.4620, found 711.4623.

**<sup>1</sup>H NMR of 1a**

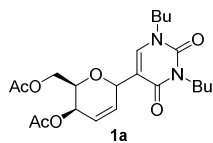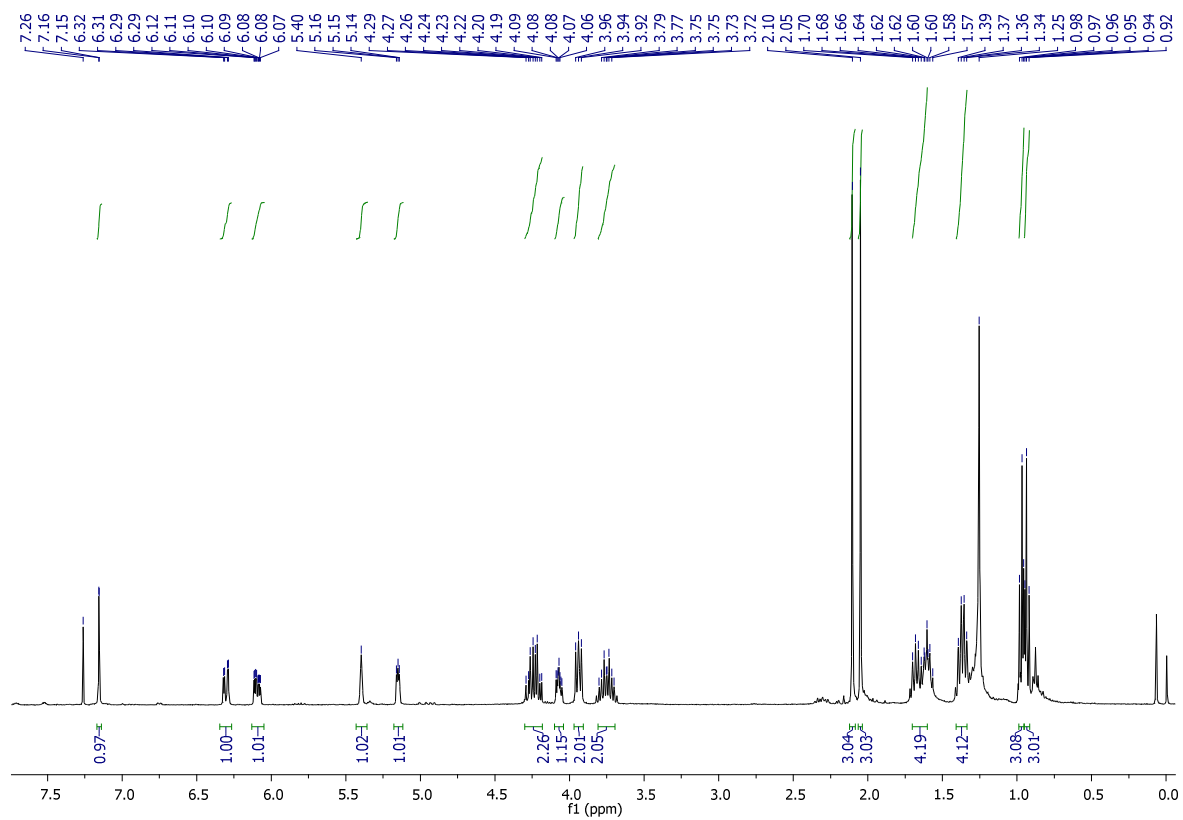

<sup>13</sup>C NMR of **1a**

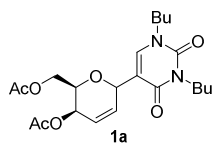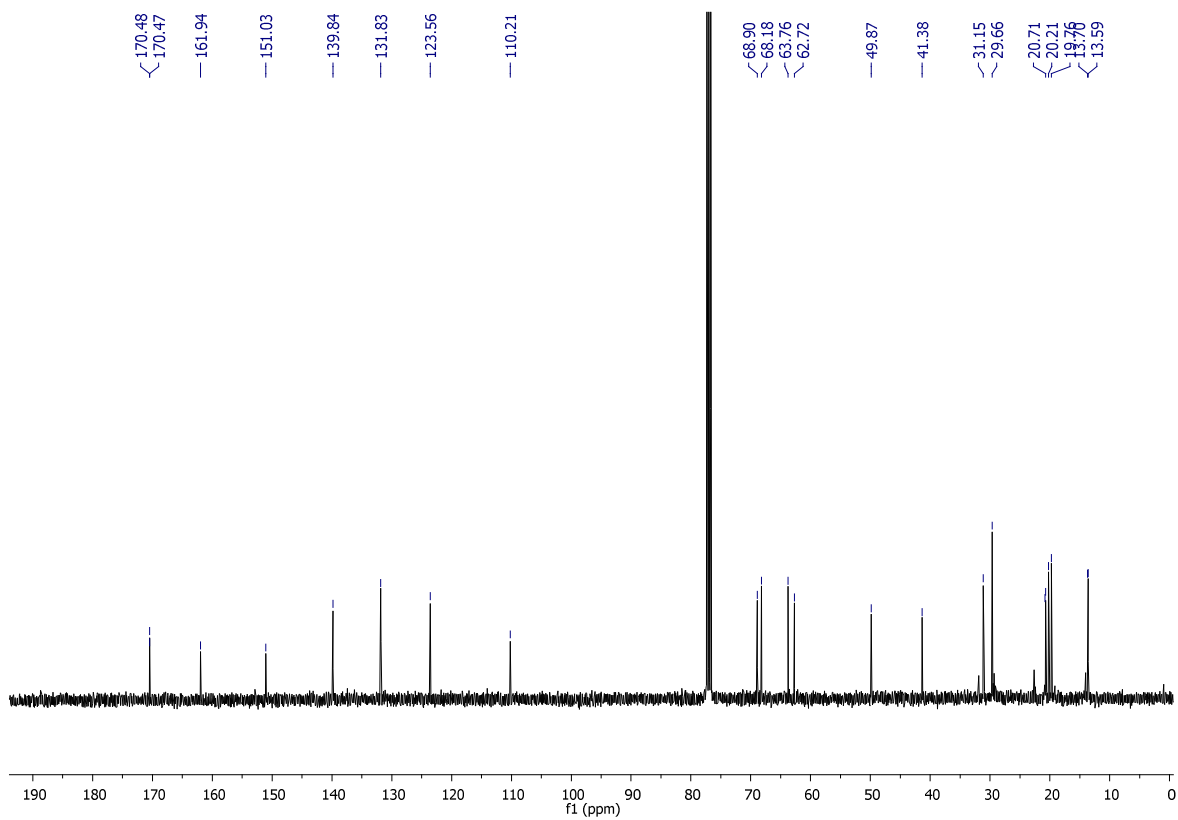

# DEPTof 1a

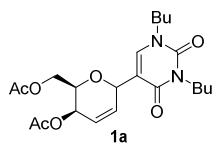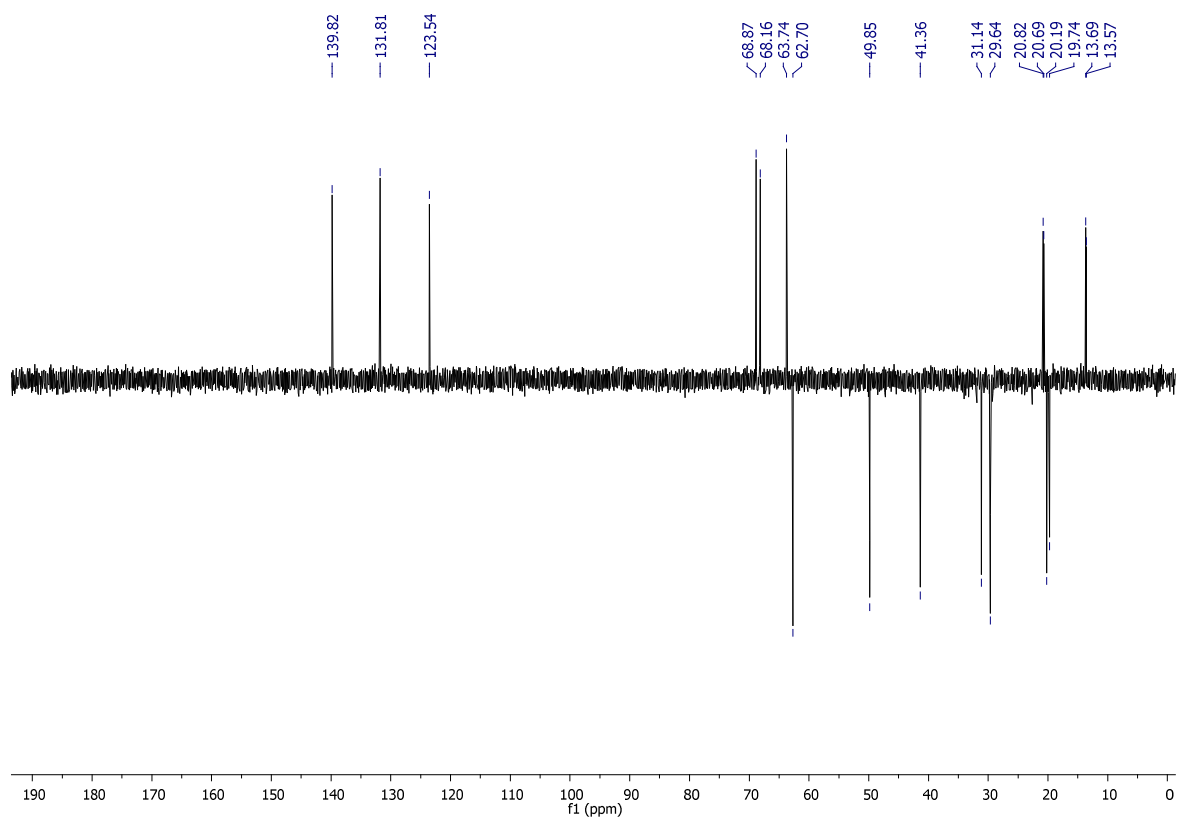

<sup>1</sup>HNMR of 2a

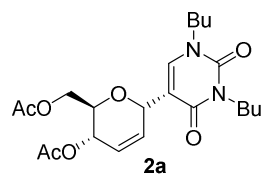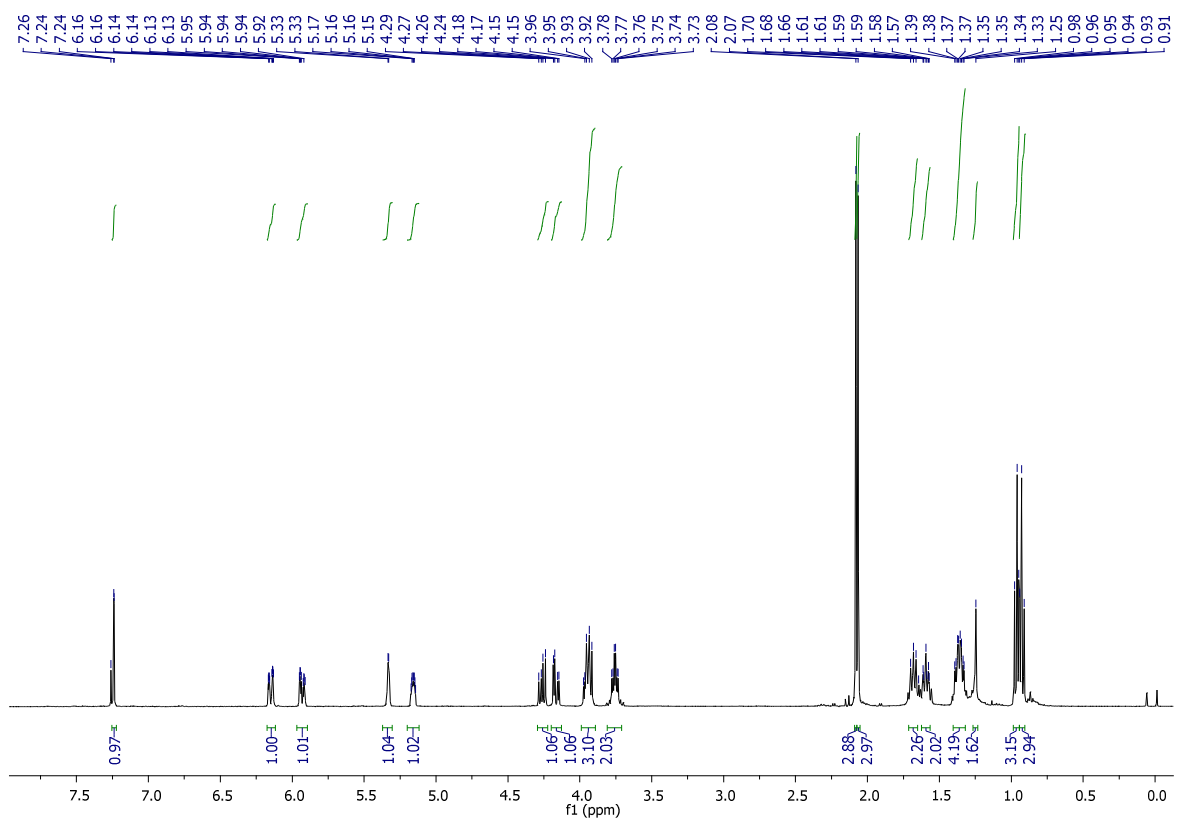

<sup>13</sup>C NMR of 2a

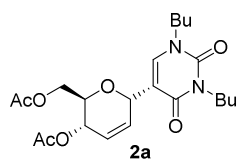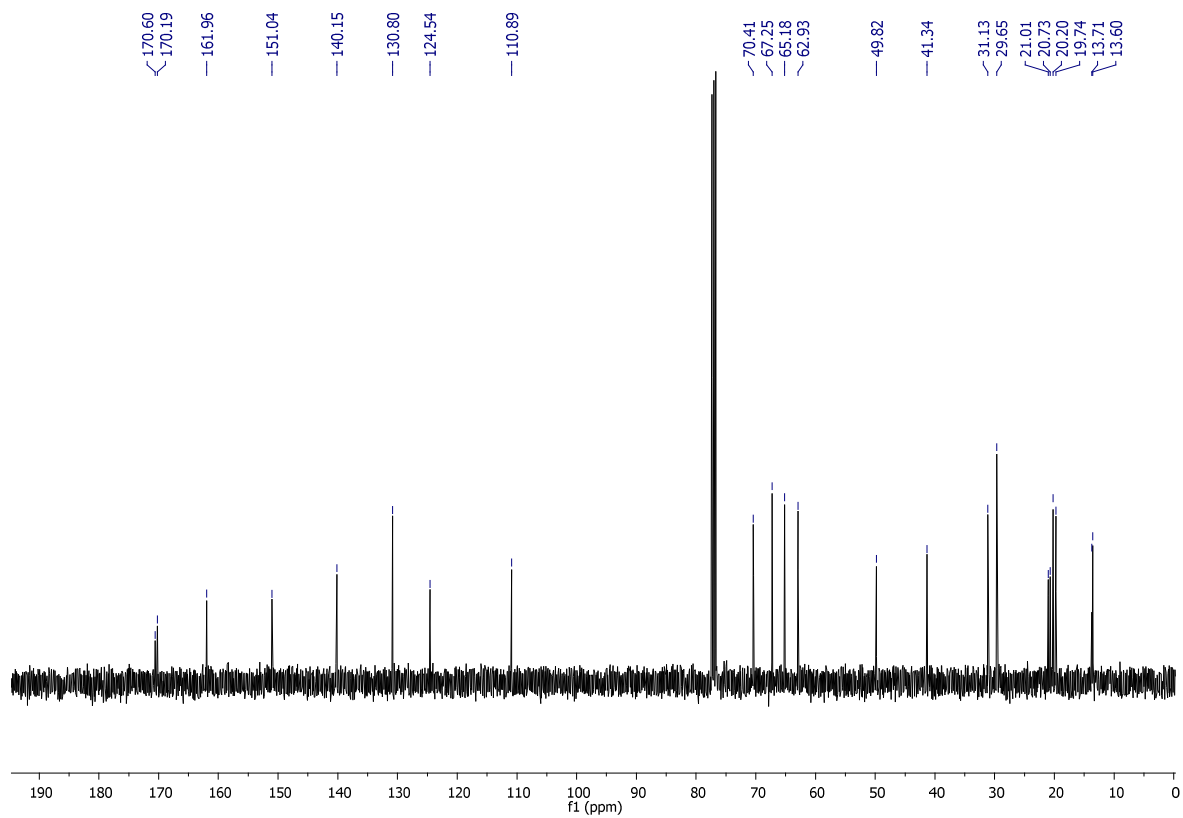

# DEPT NMR of 2a

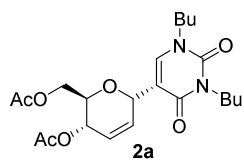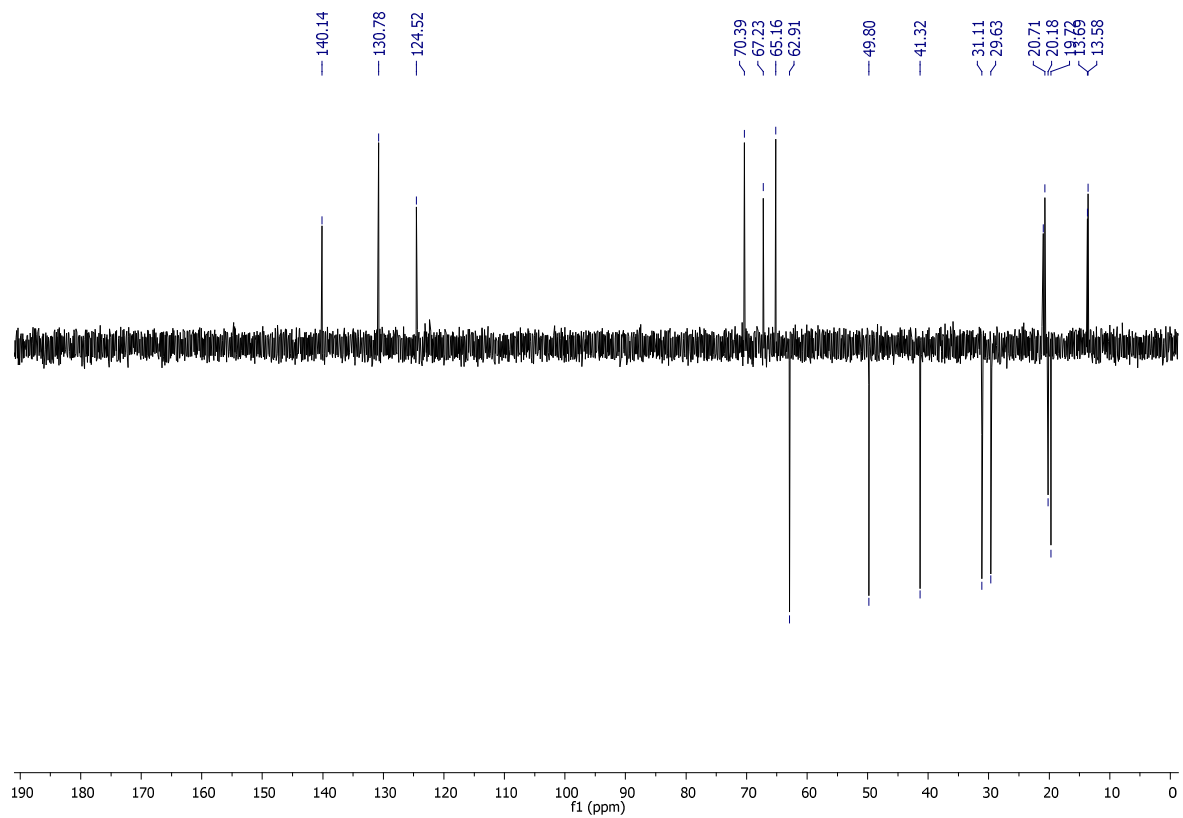

<sup>1</sup>HNMR of 3a

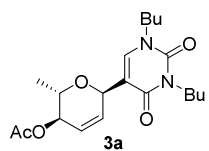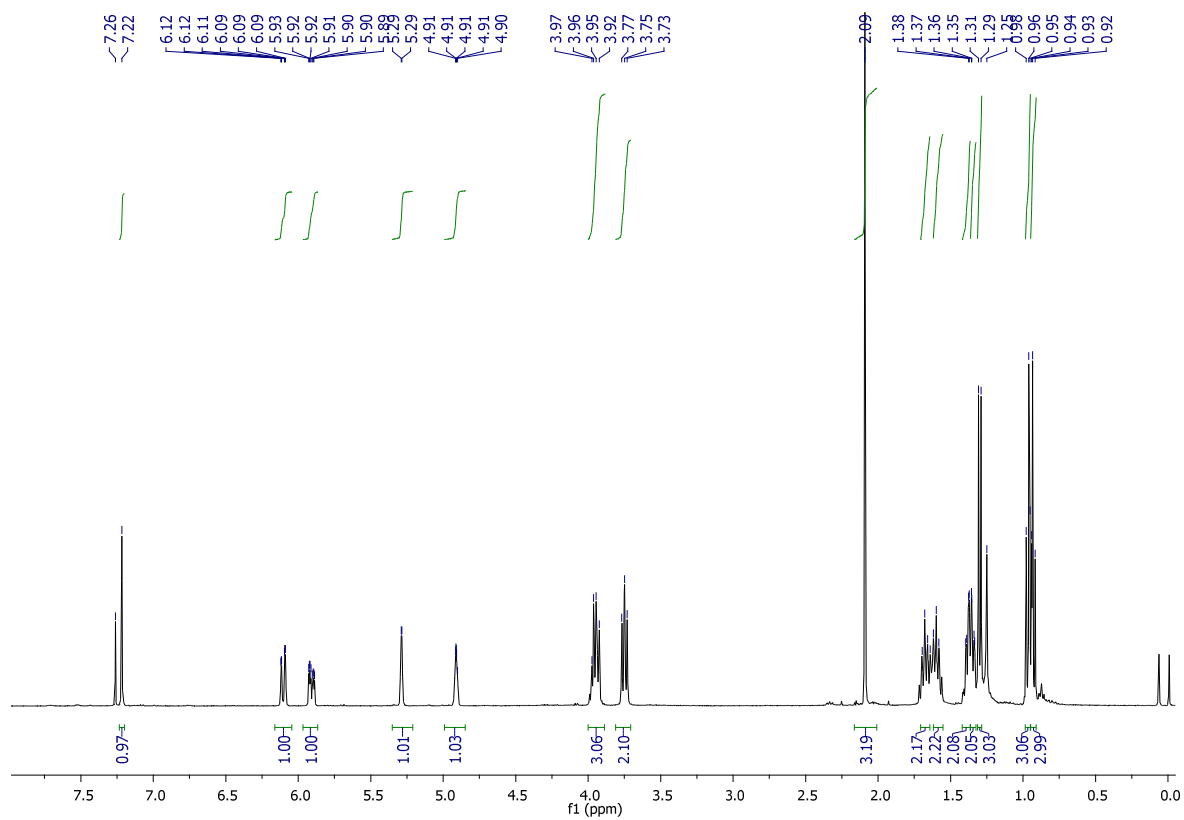

<sup>13</sup>CNMR of 3a

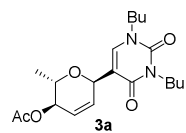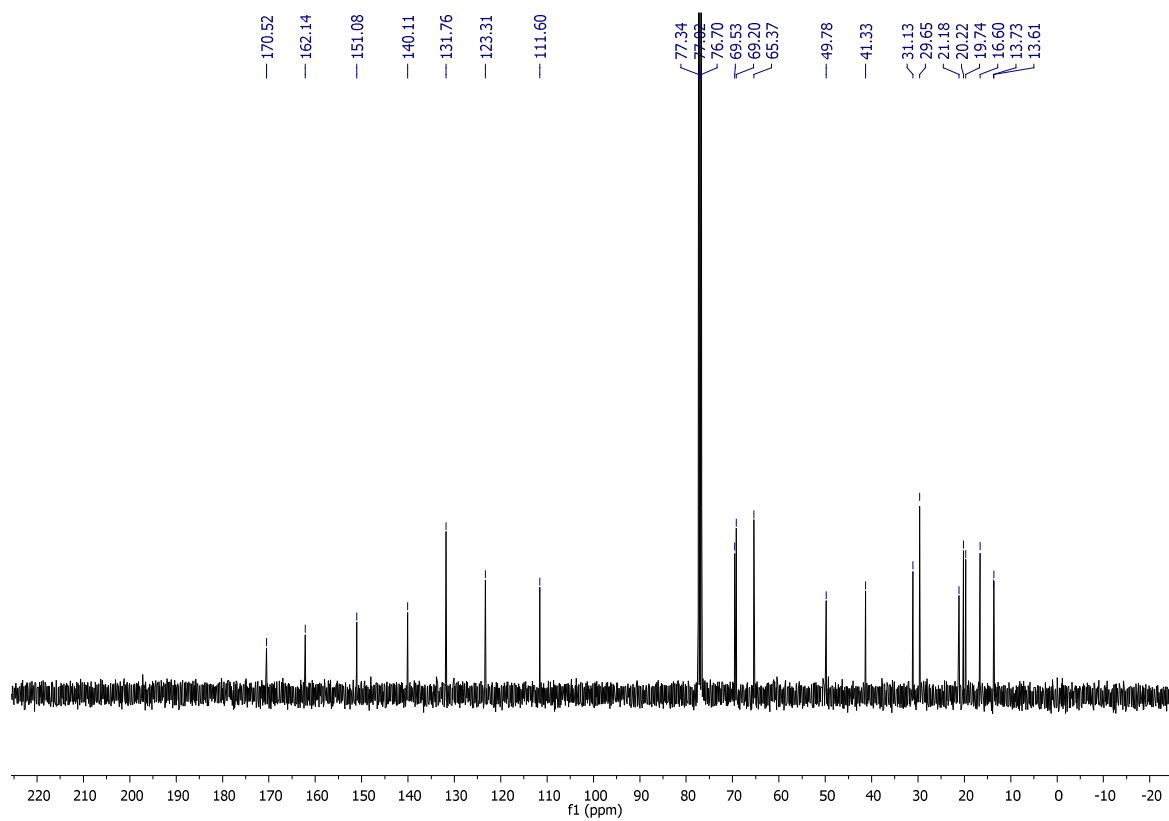

# DEPT of 3a

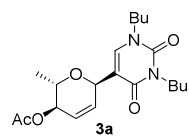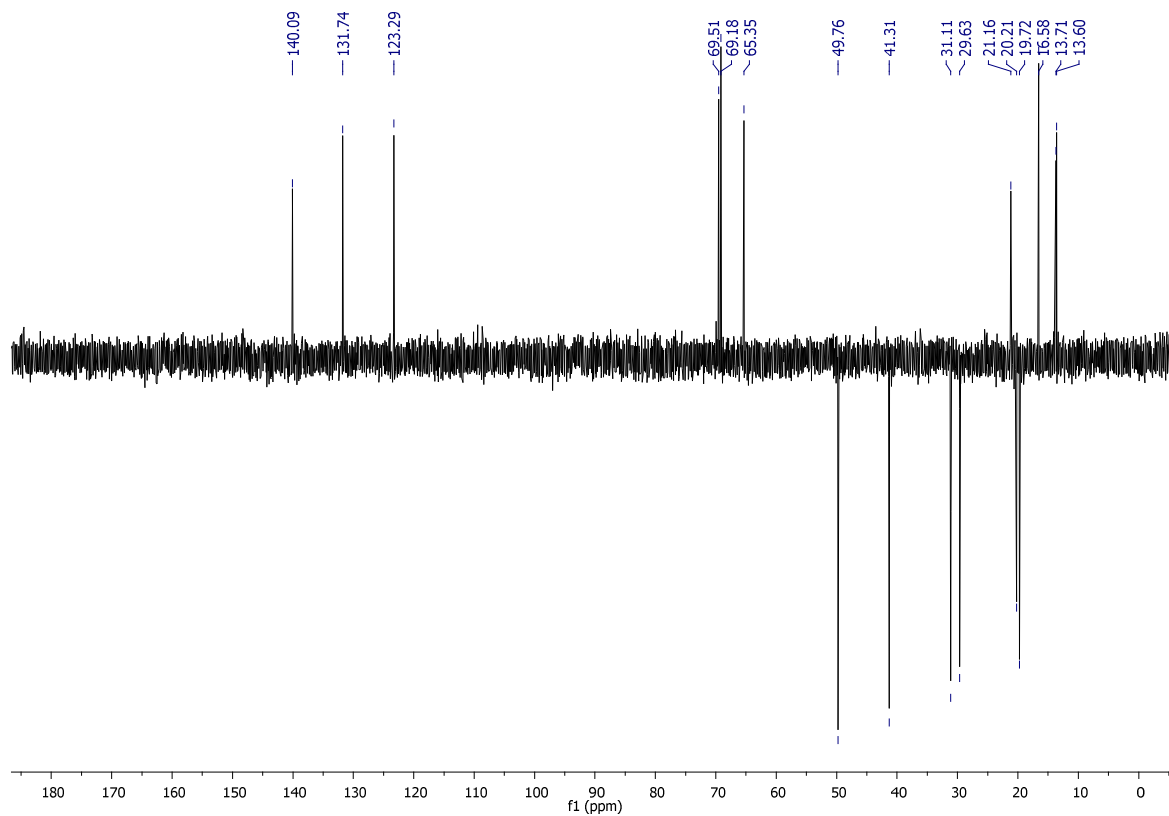

<sup>1</sup>H NMR of 4a

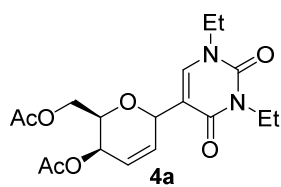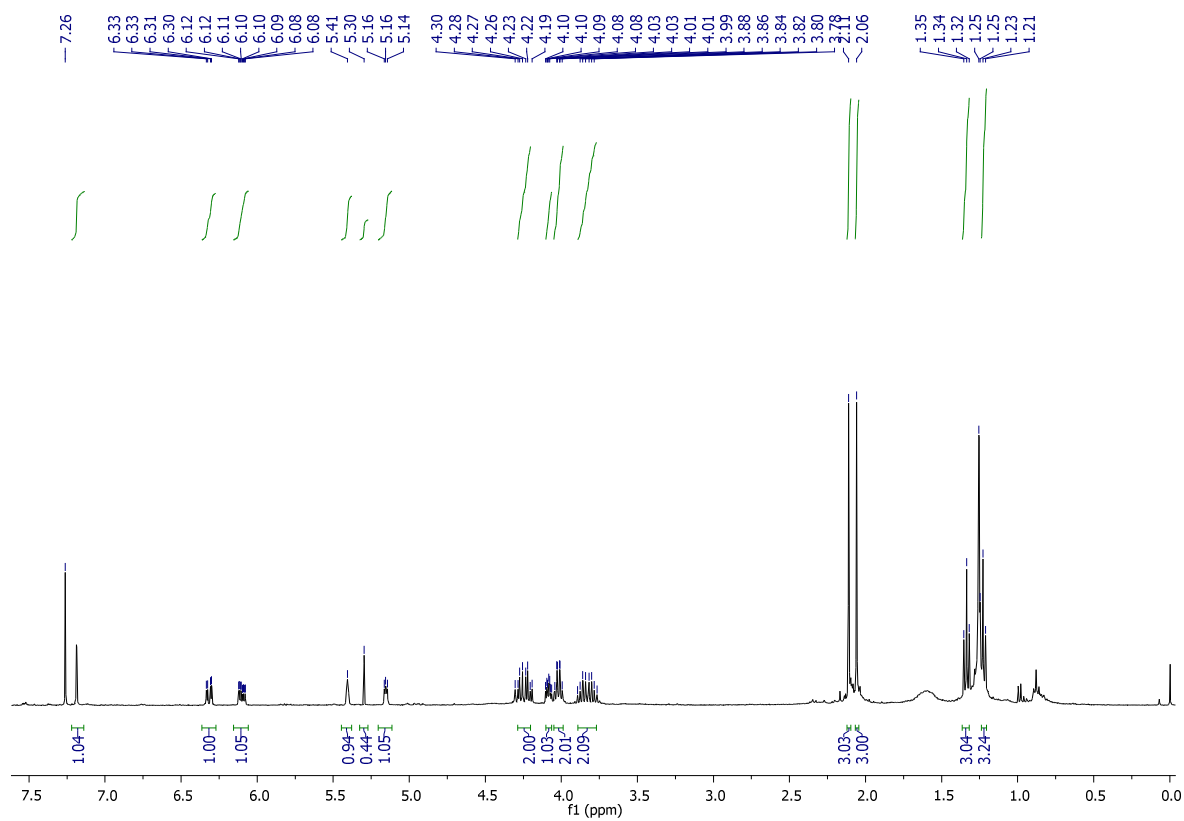

<sup>13</sup>C NMR of 4a

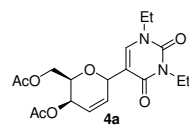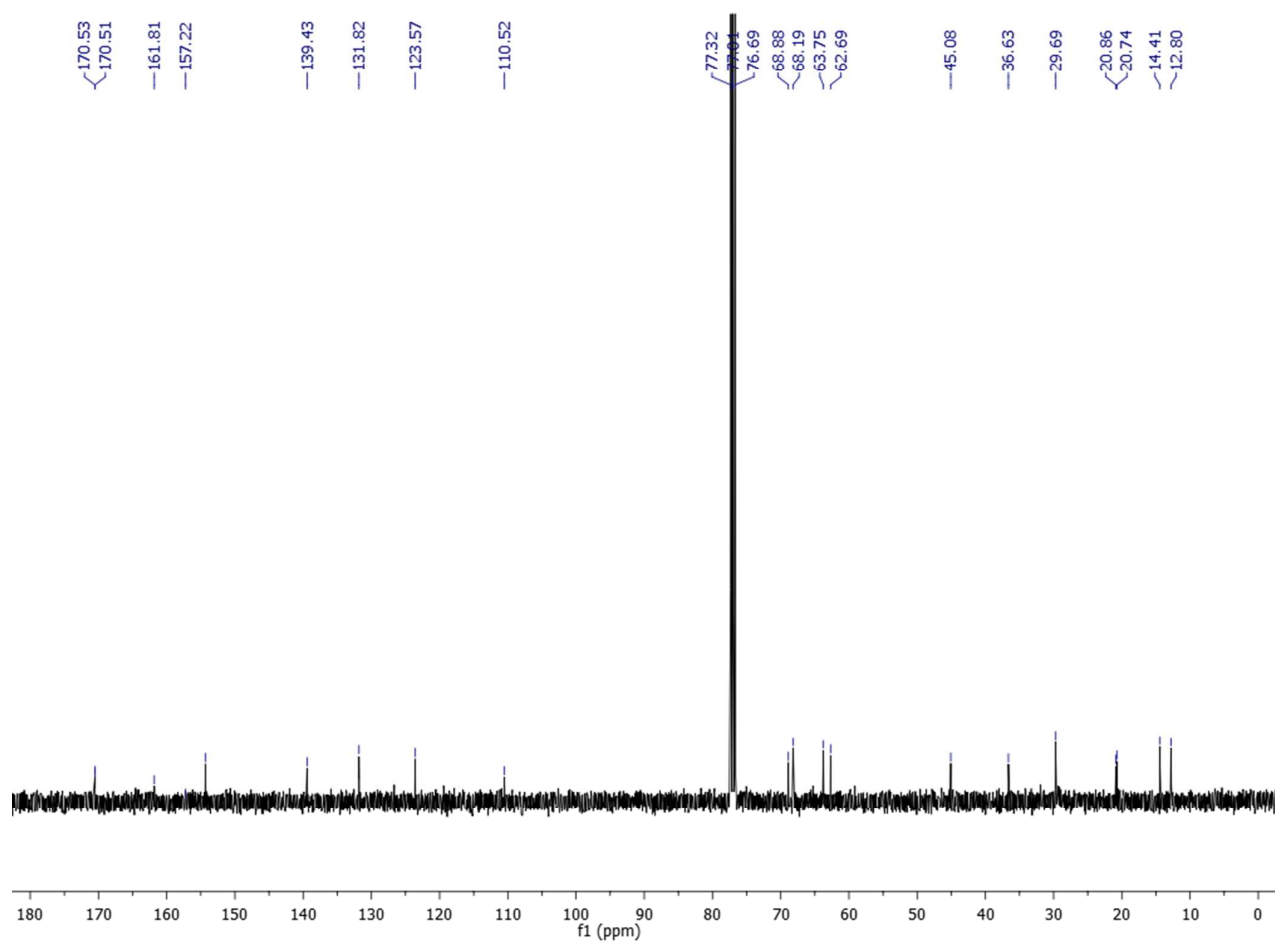

# DEPT of 4a

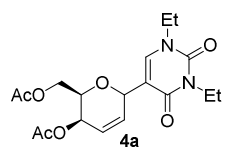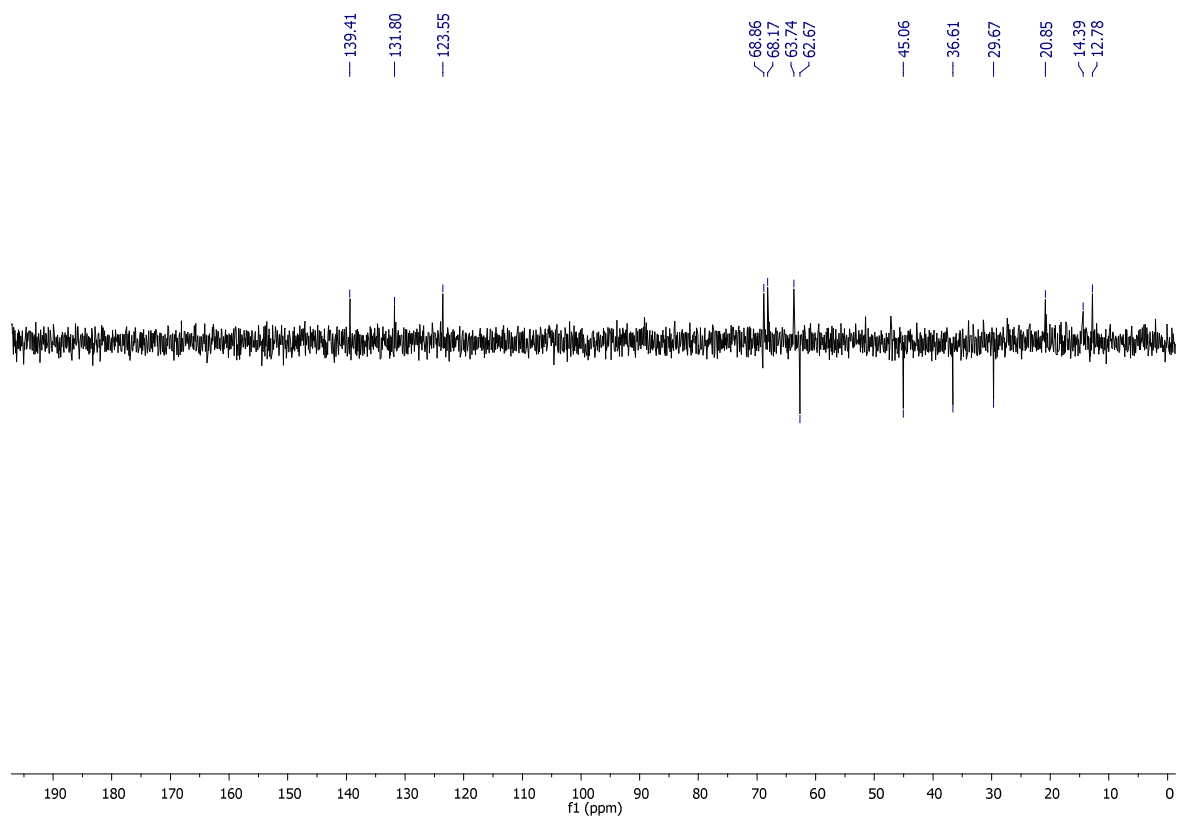

<sup>1</sup>HNMR of 5a

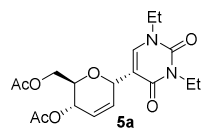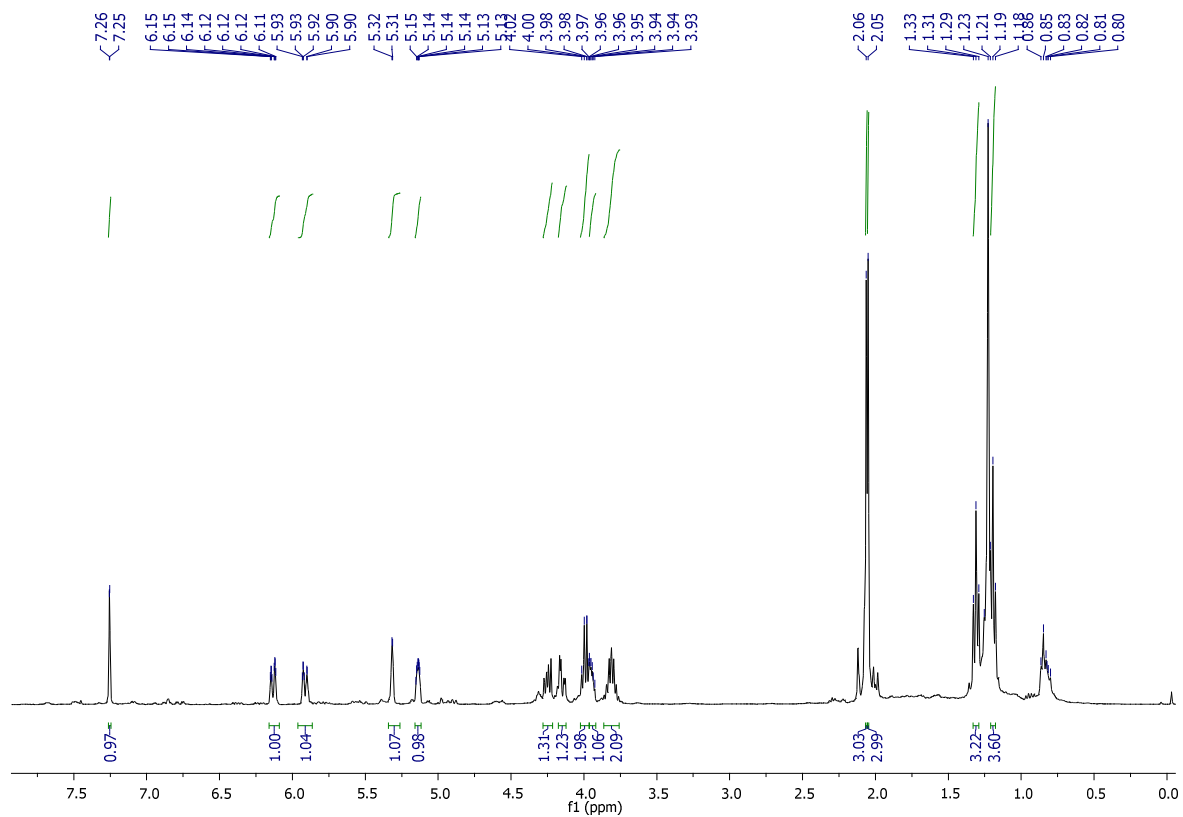

<sup>13</sup>C NMR of 5a

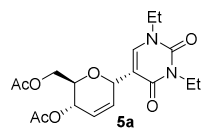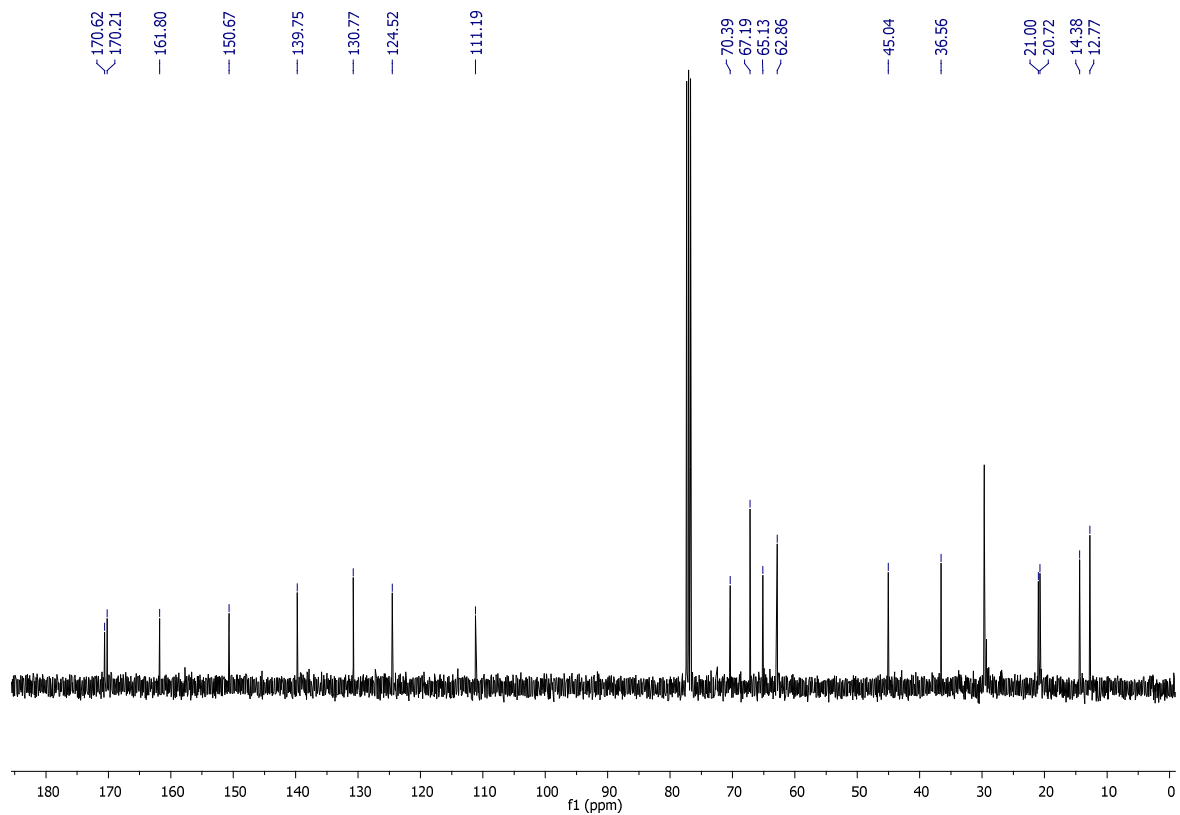

# DEPT NMR of 5a

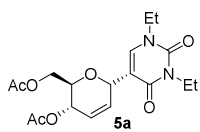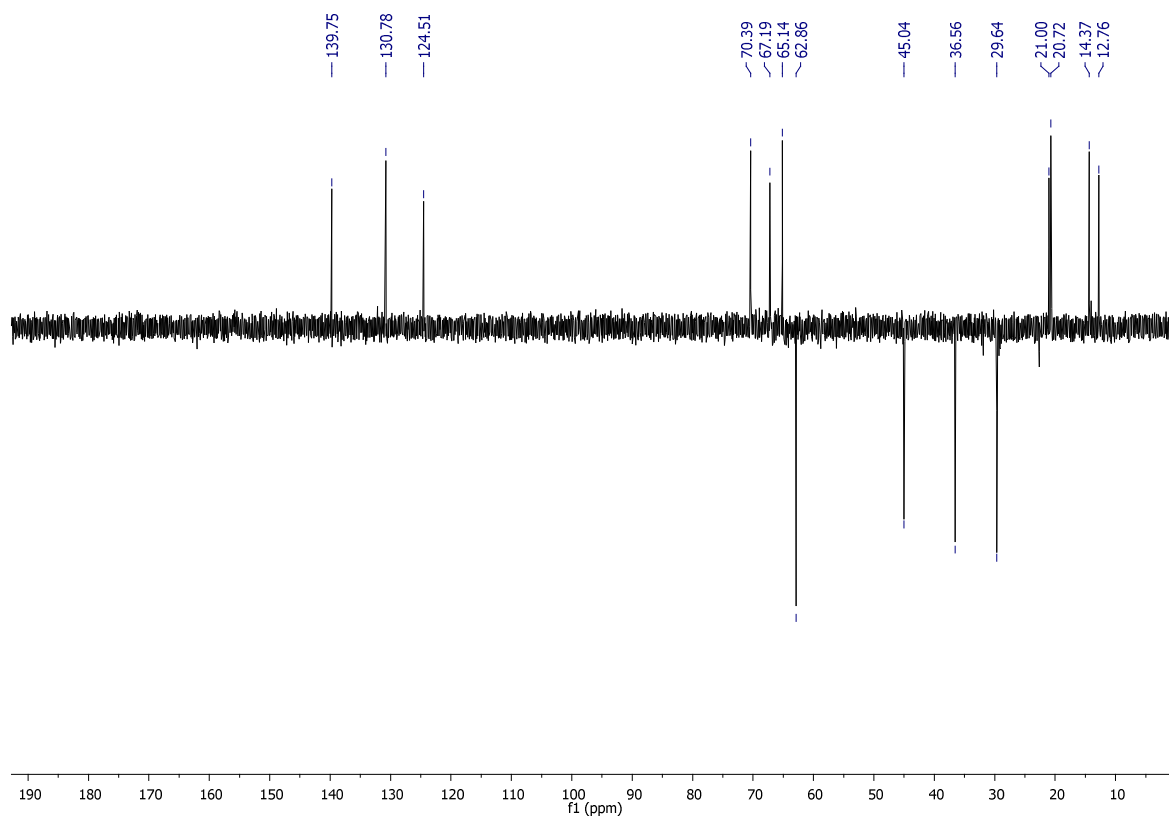

<sup>1</sup>H NMR of 6a

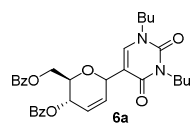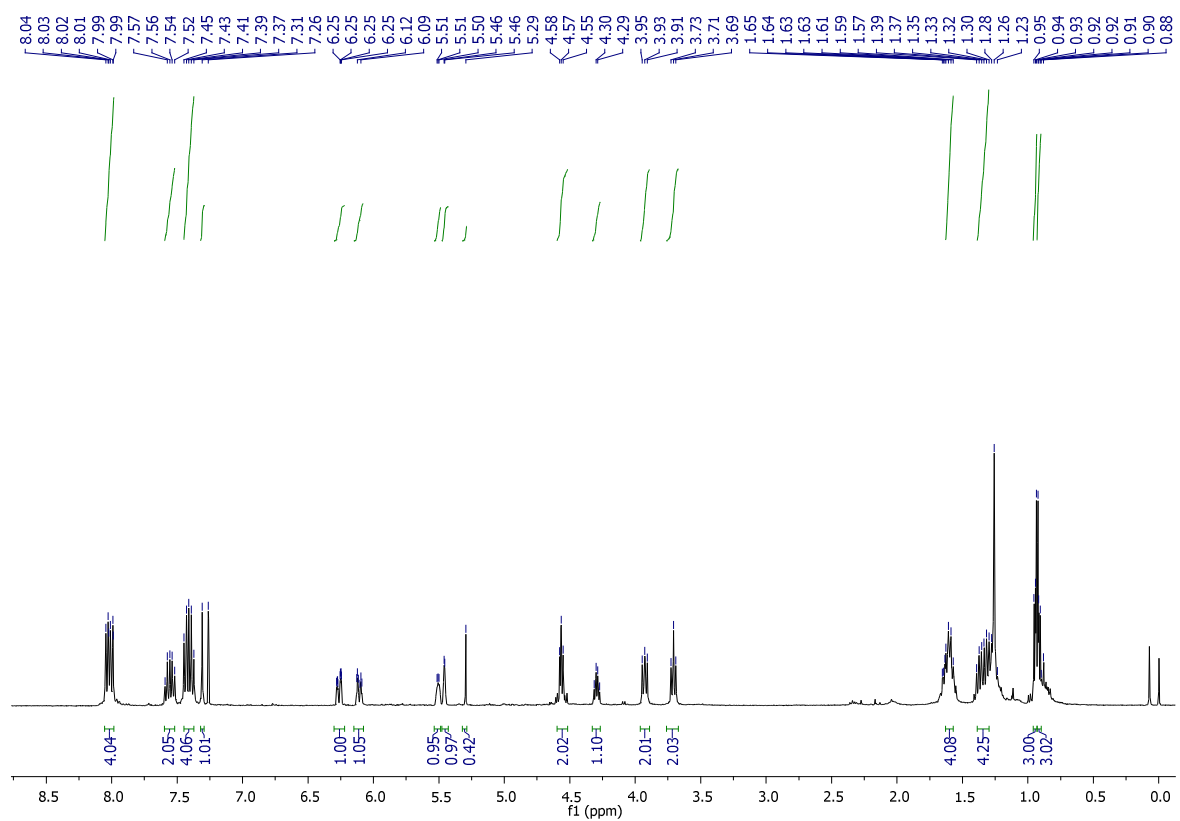

<sup>13</sup>C NMR of 6a

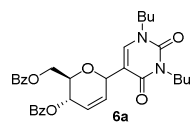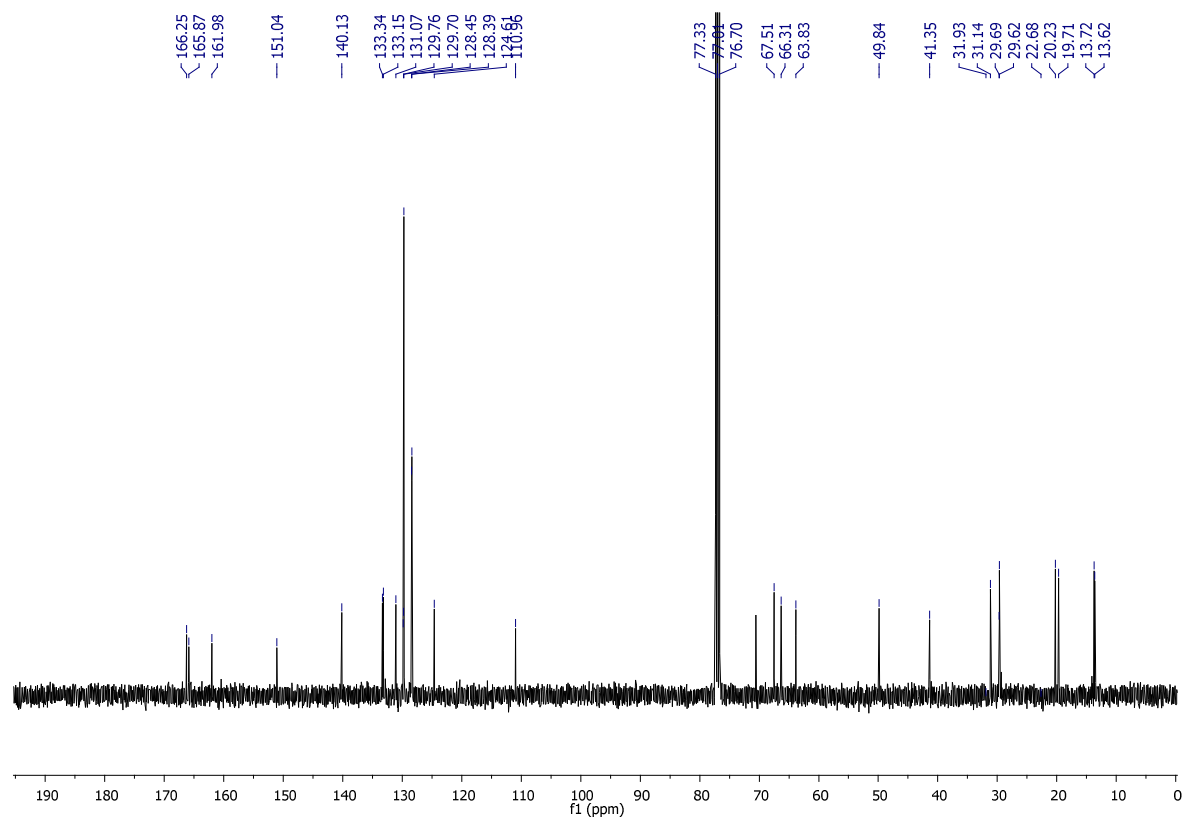

# DEPT of 6a

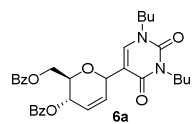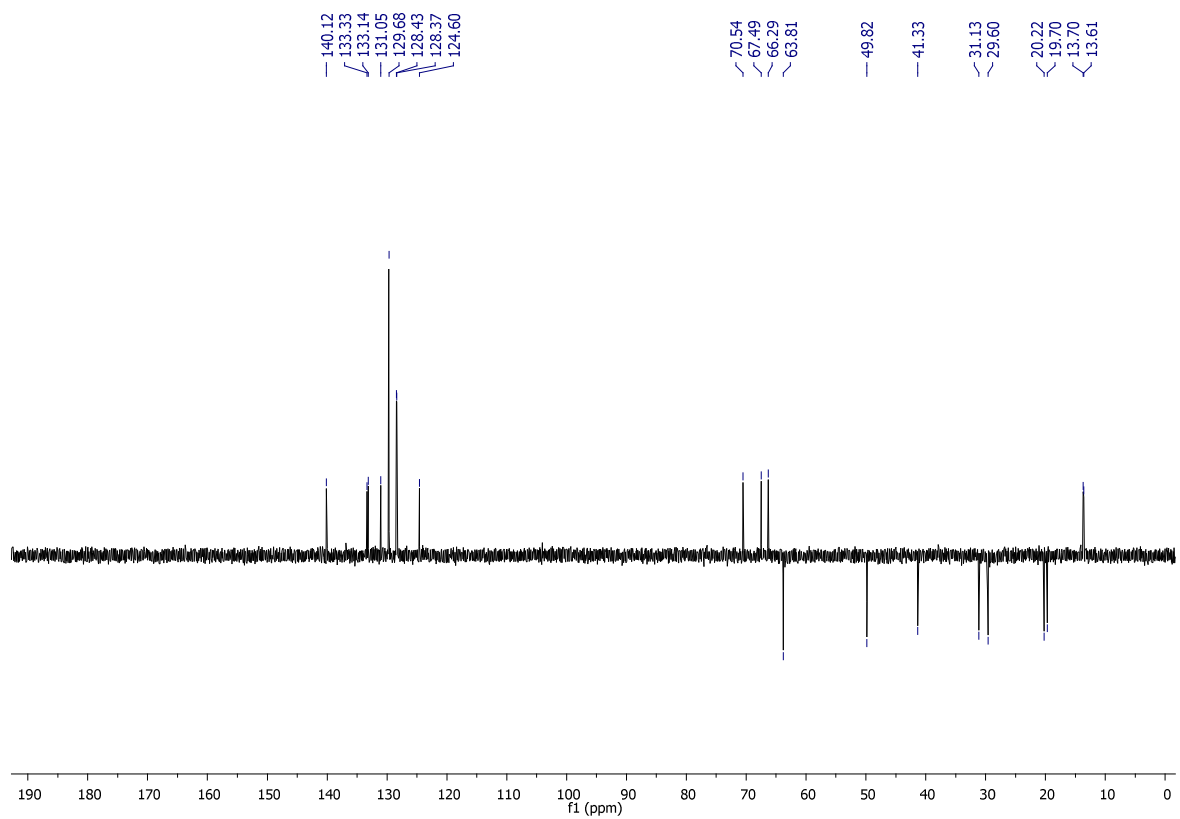

<sup>1</sup>H of 7a

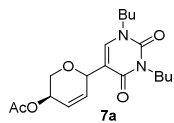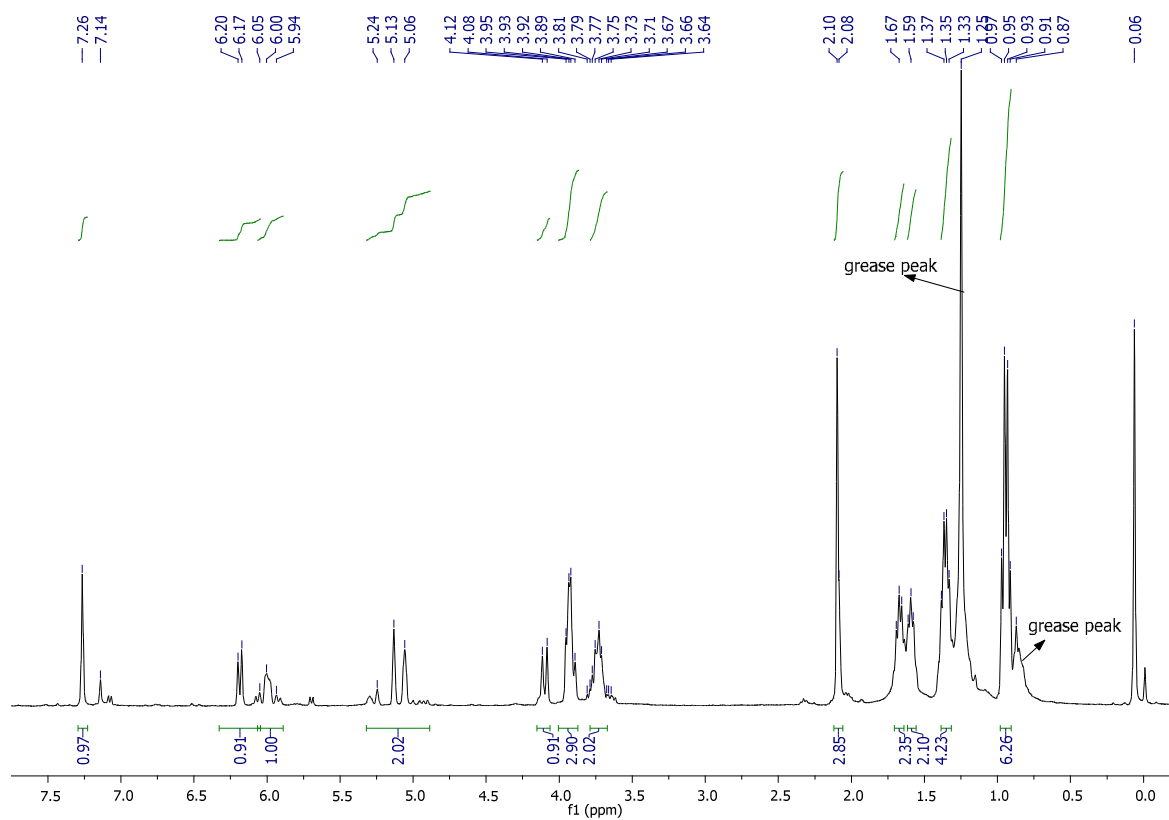

<sup>13</sup>C of 7a

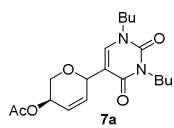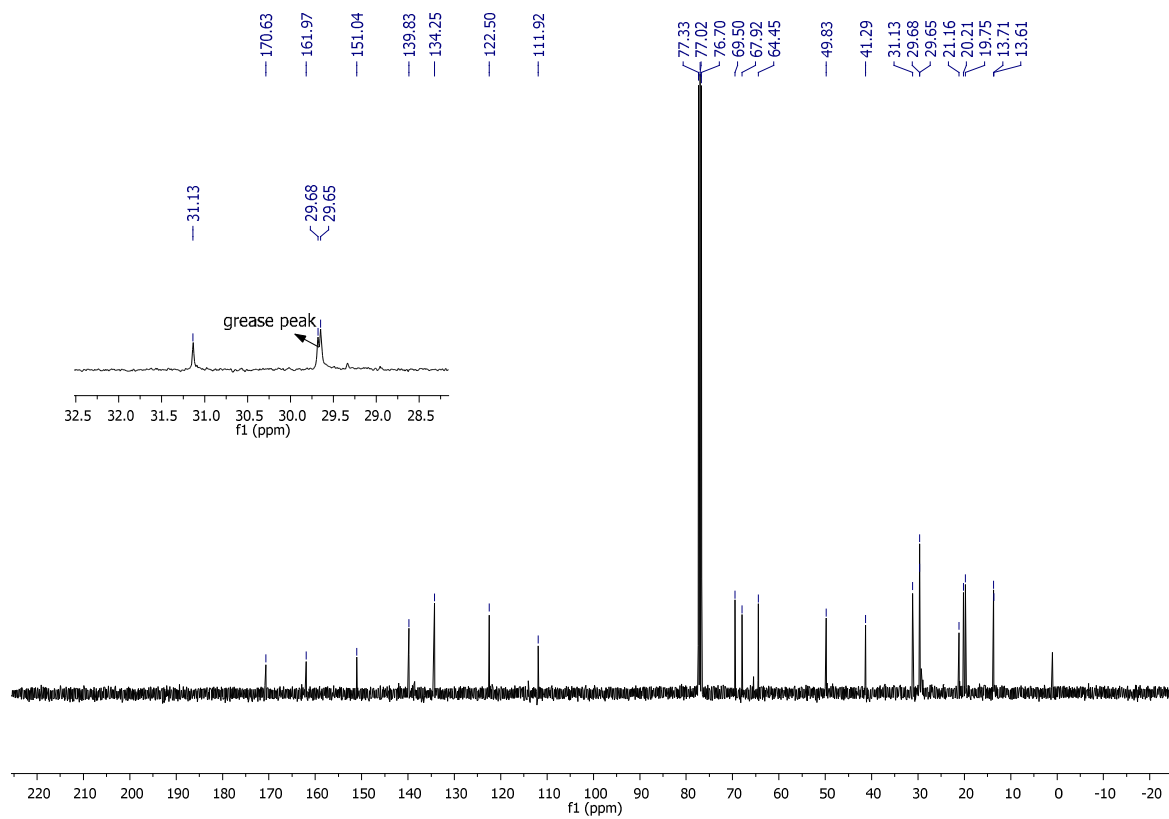

# DEPT of 7a

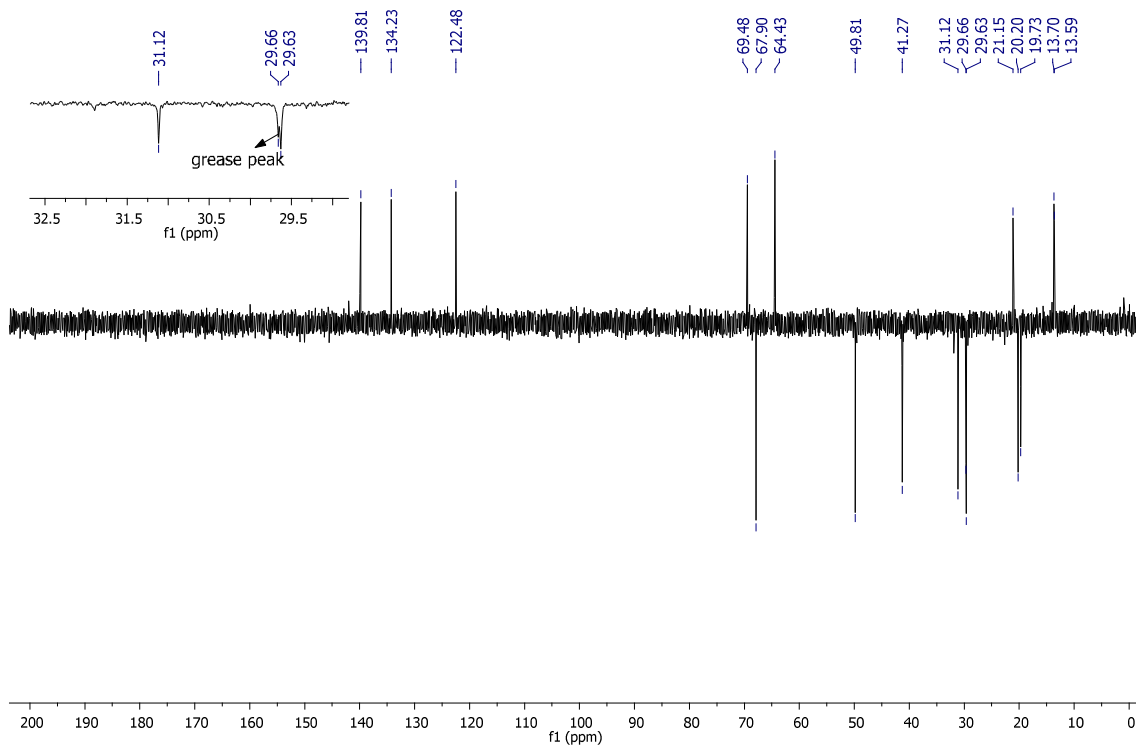

**<sup>1</sup>H NMR of 1b**

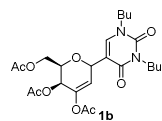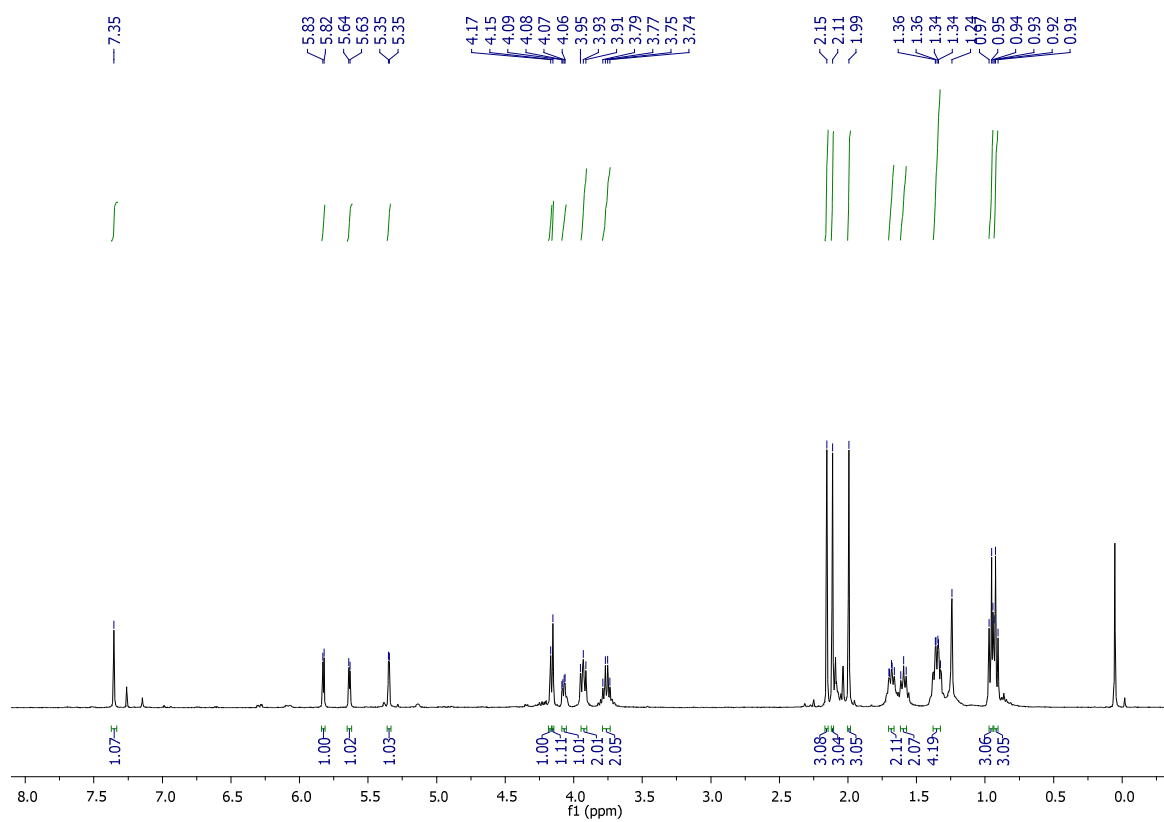

**$^{13}\text{C}$  NMR of 1b**

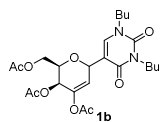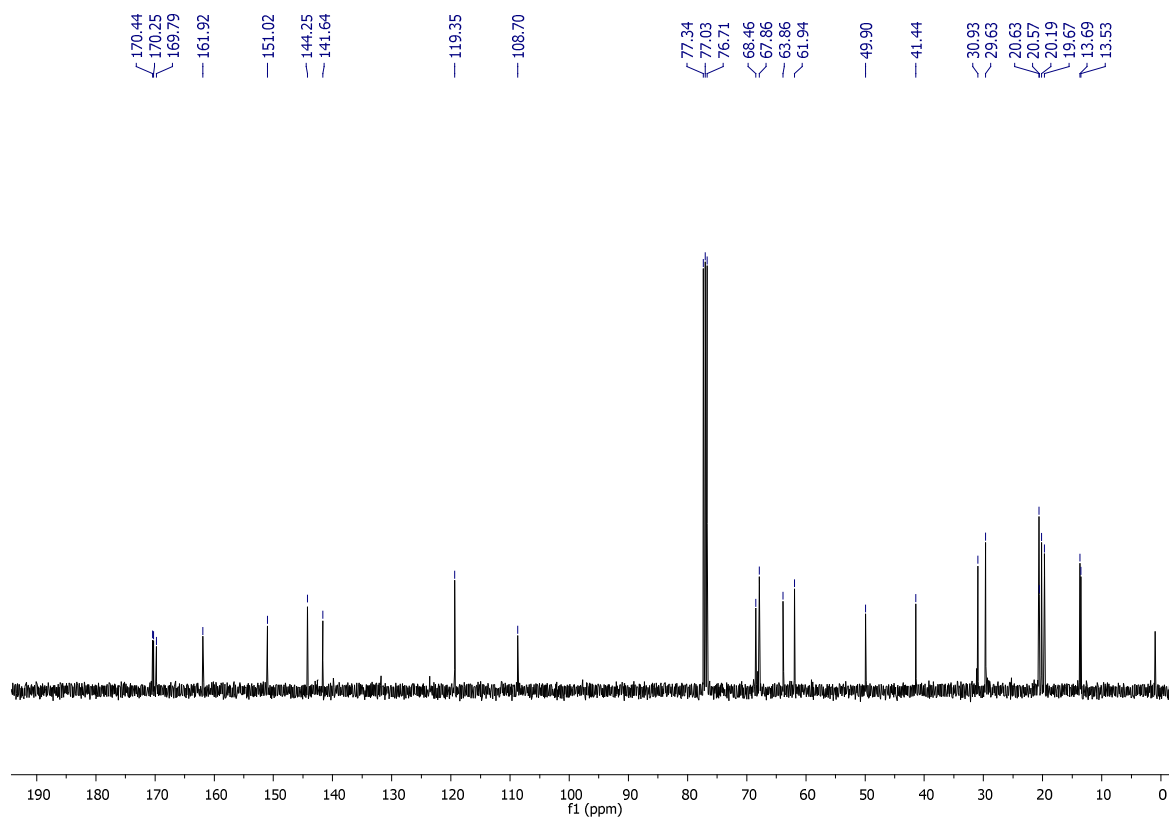

# DEPT of 1b

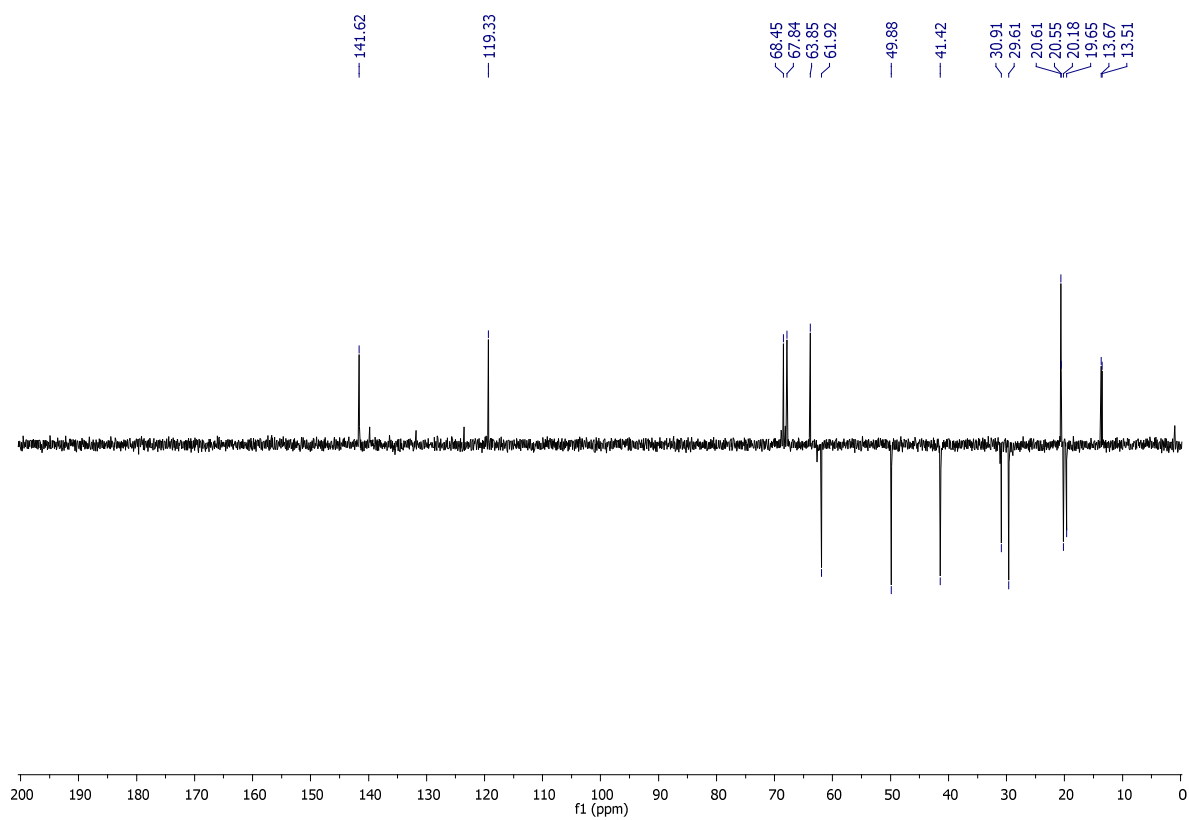

<sup>1</sup>H of 2b

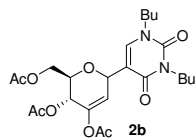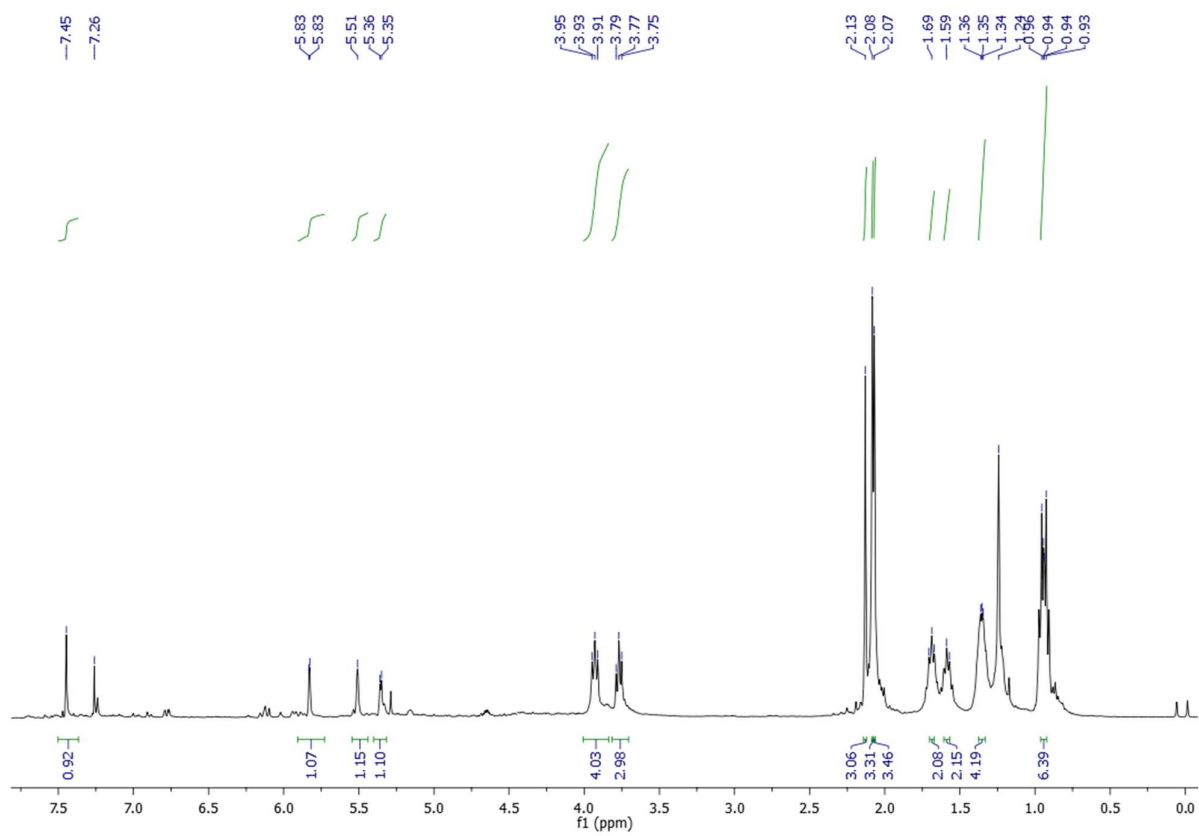

<sup>13</sup>C of 2b

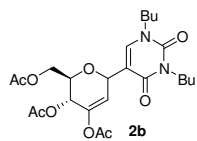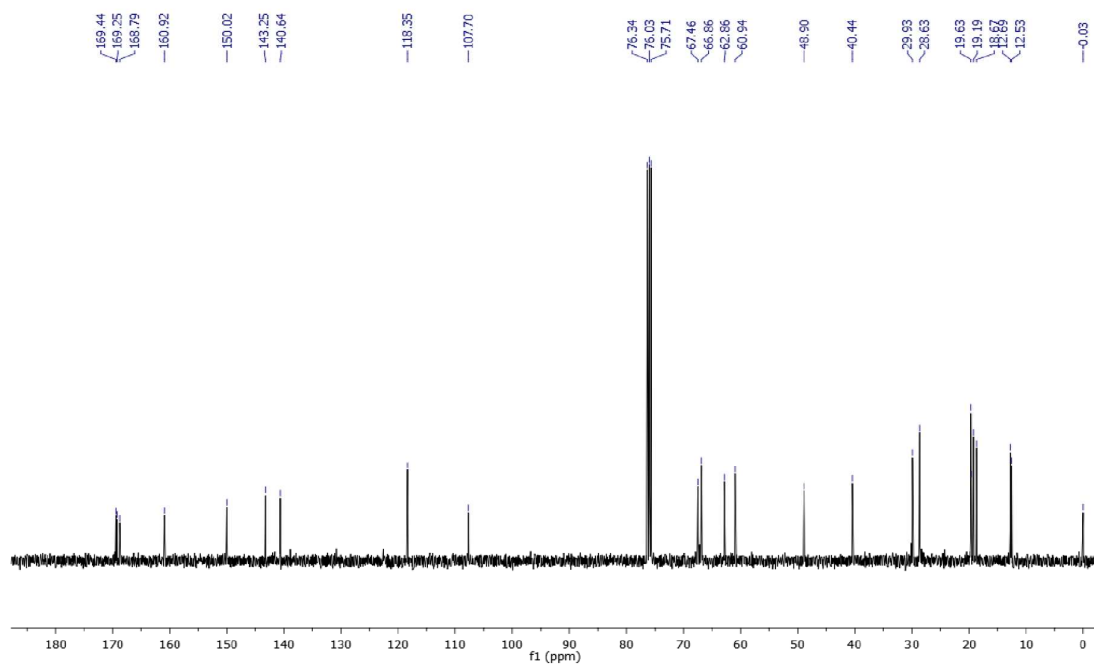

# Dept of 2b

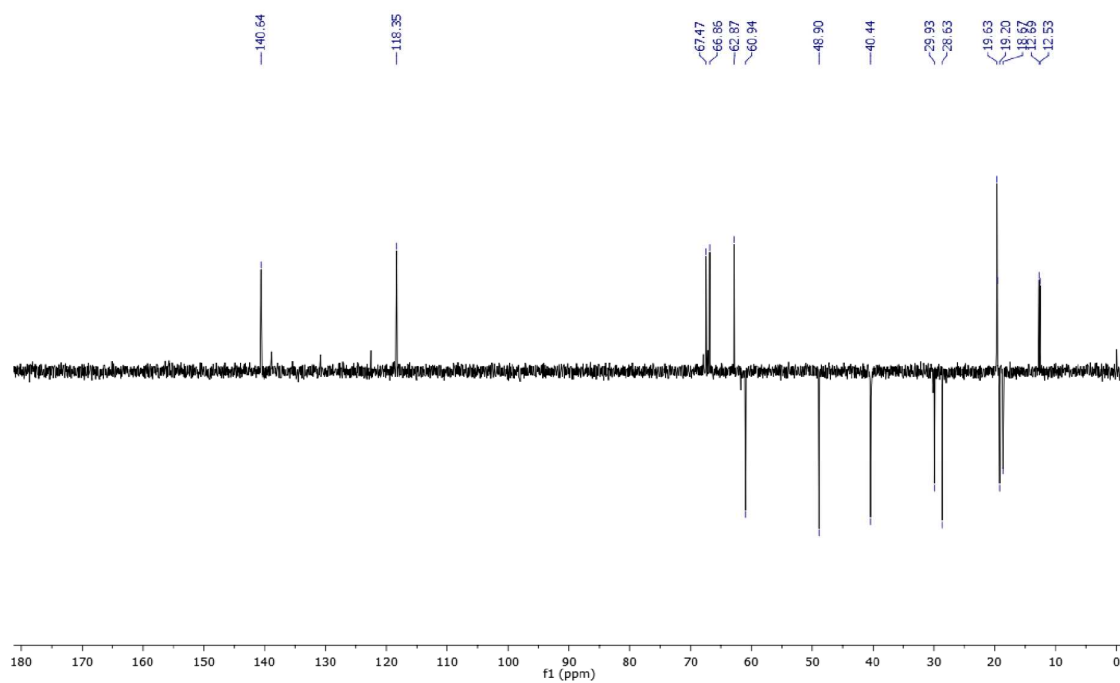

<sup>1</sup>H of 3b

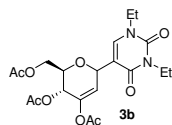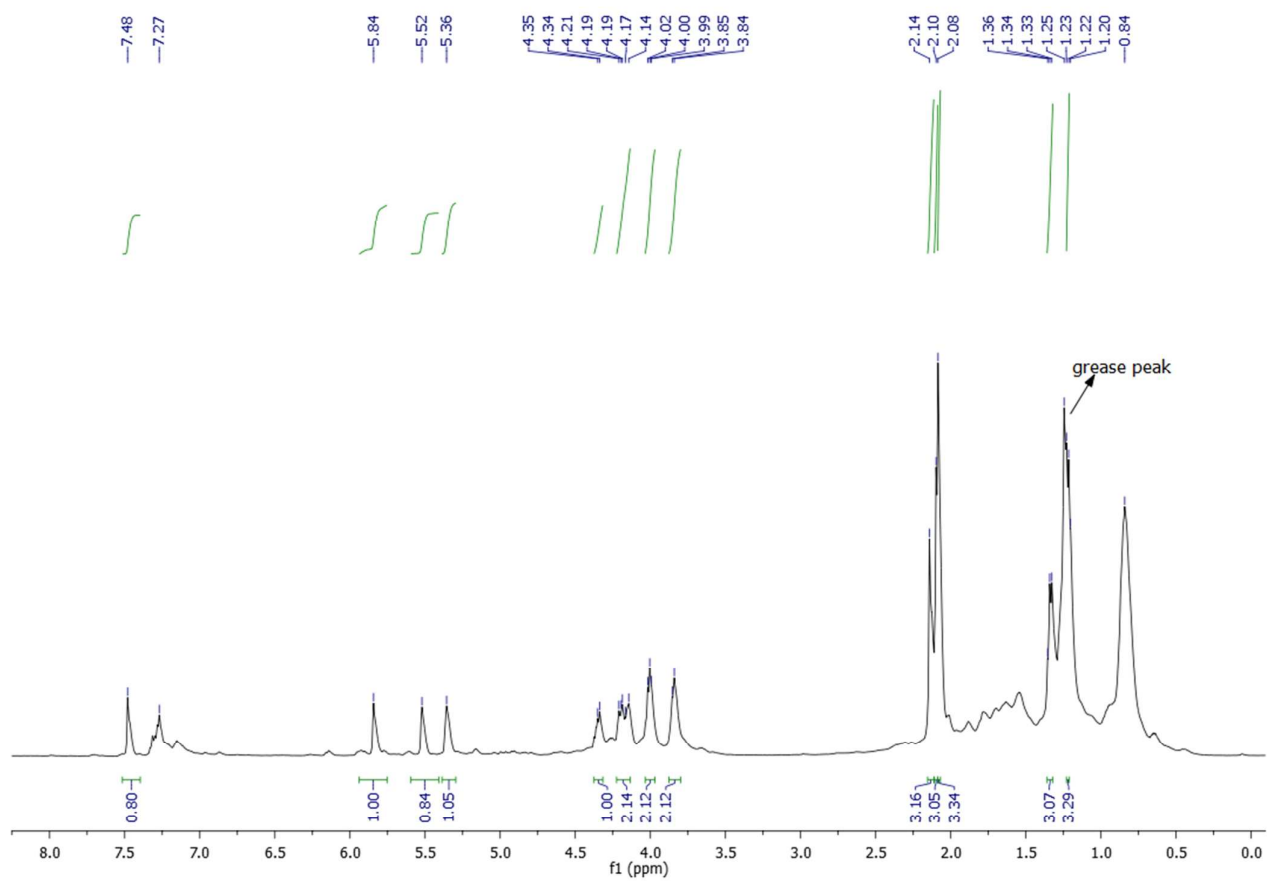

<sup>13</sup>C of 3b

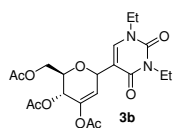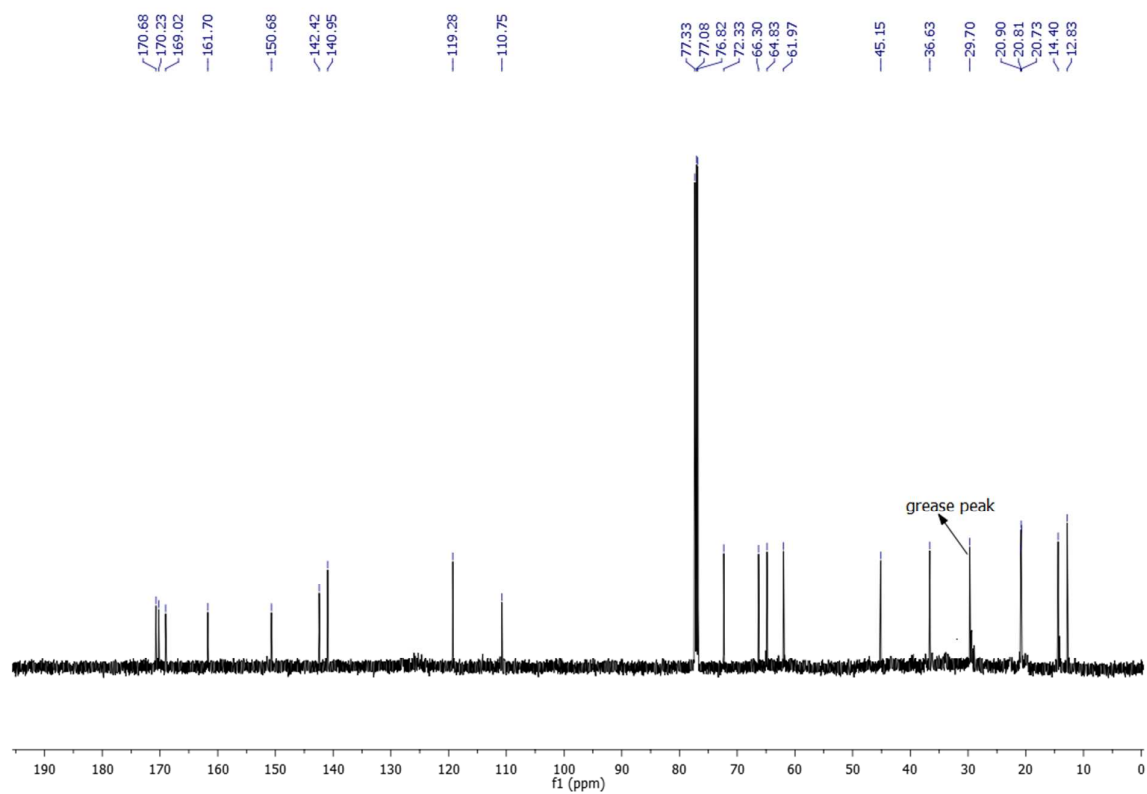

# DEPT of 3b

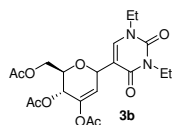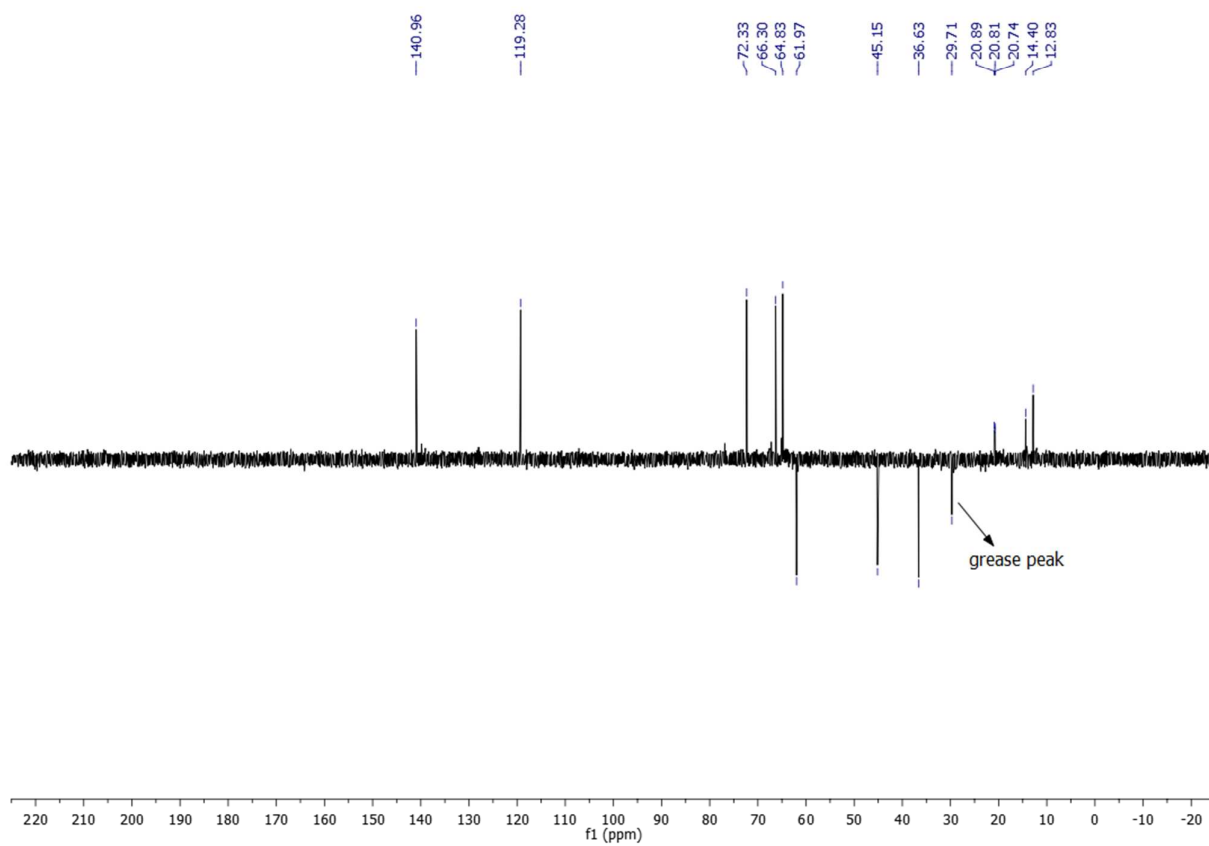

$^1\text{H}$  of 4b

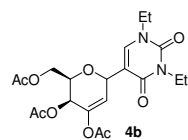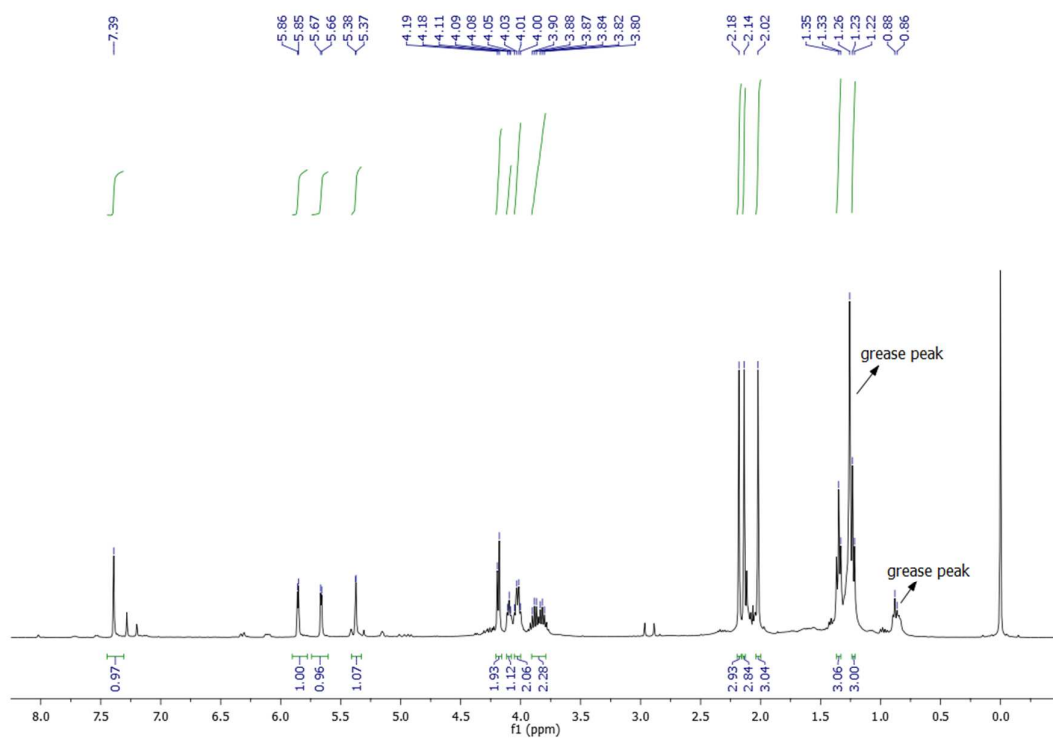

<sup>13</sup>C of 4b

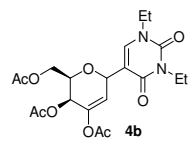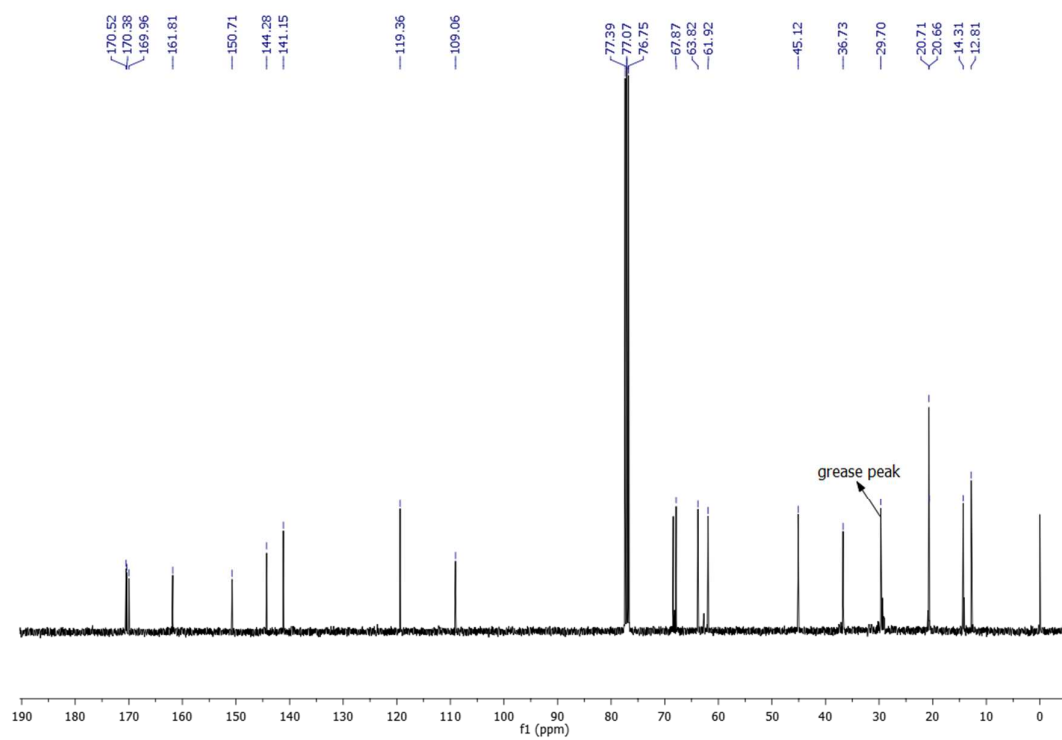

# DEPT of 4b

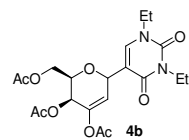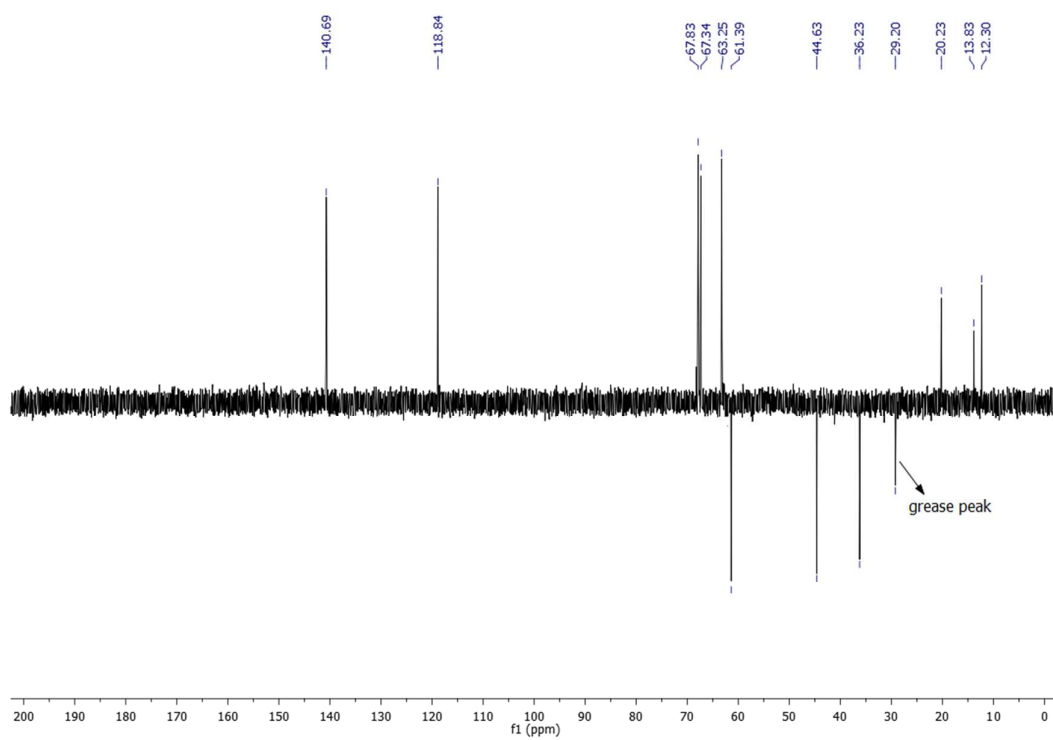

<sup>1</sup>H NMR of 5b

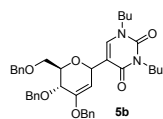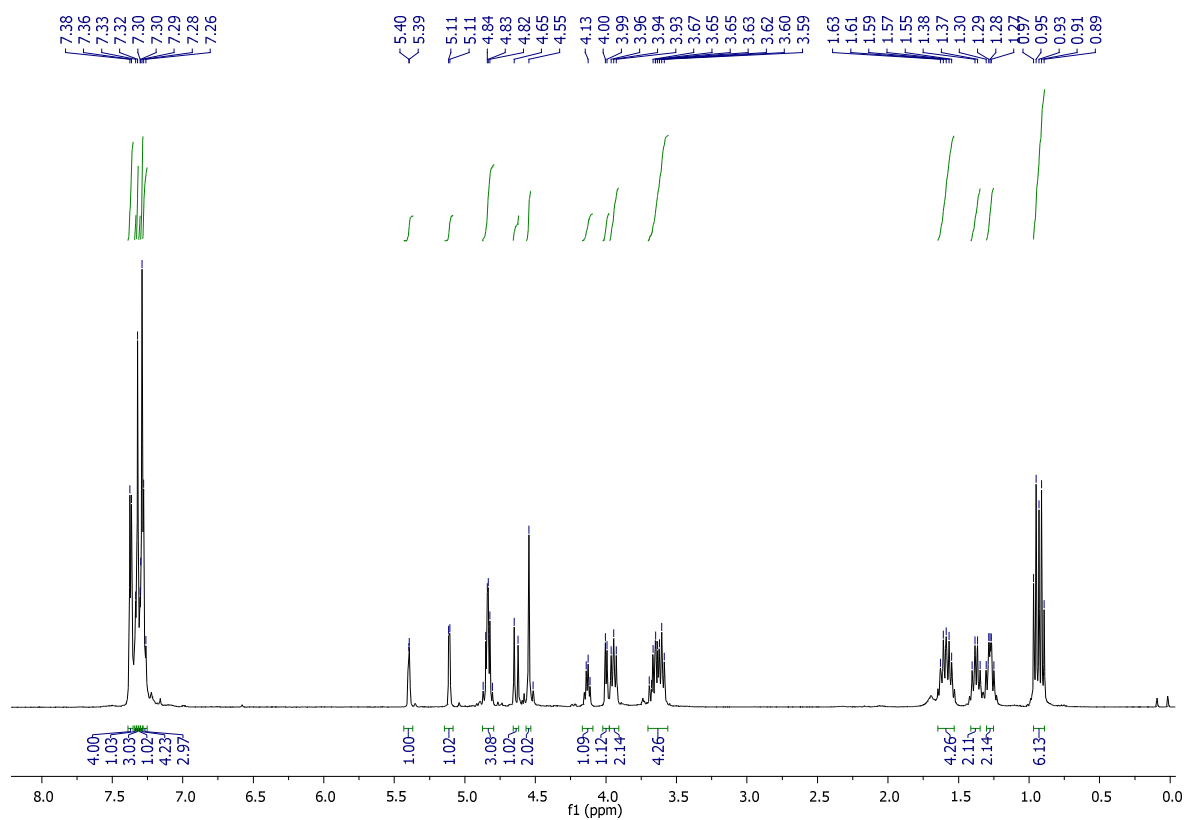

<sup>13</sup>C NMR of 5b

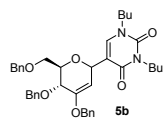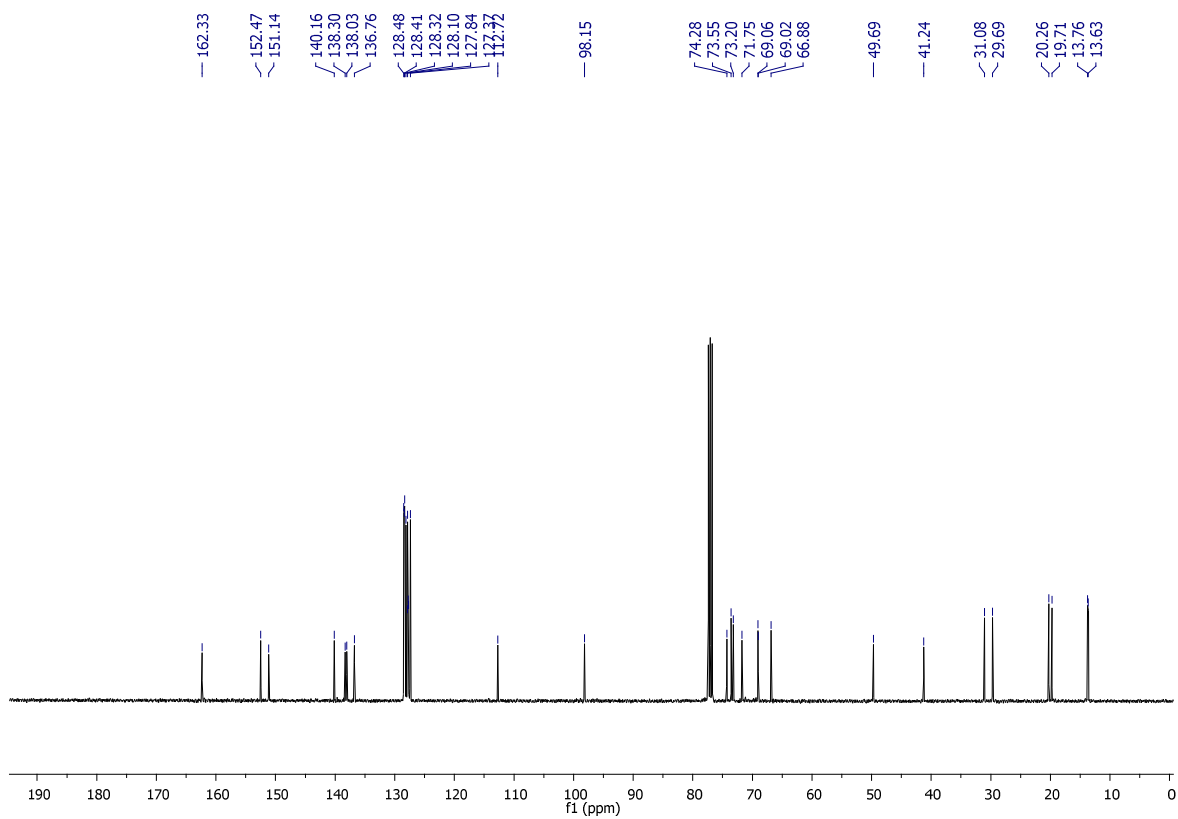

# DEPT of 5b

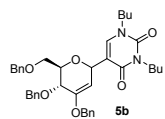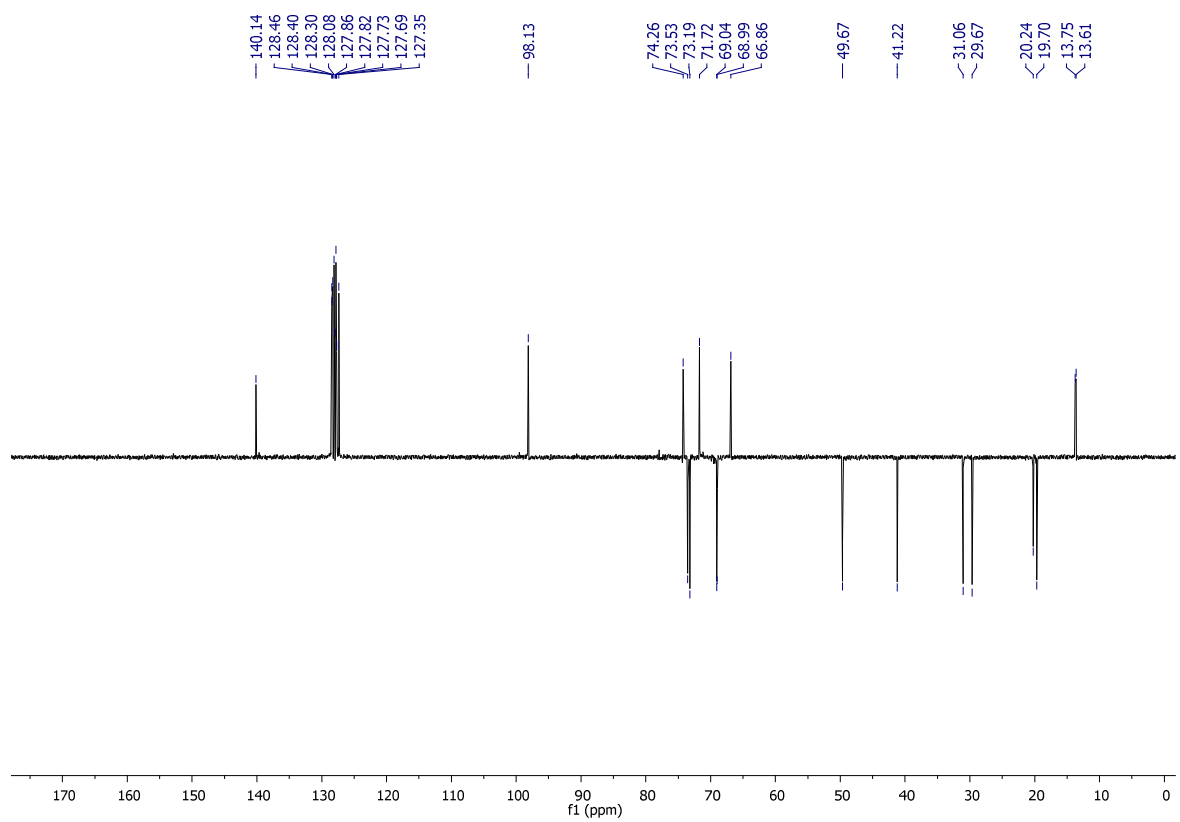

## 47

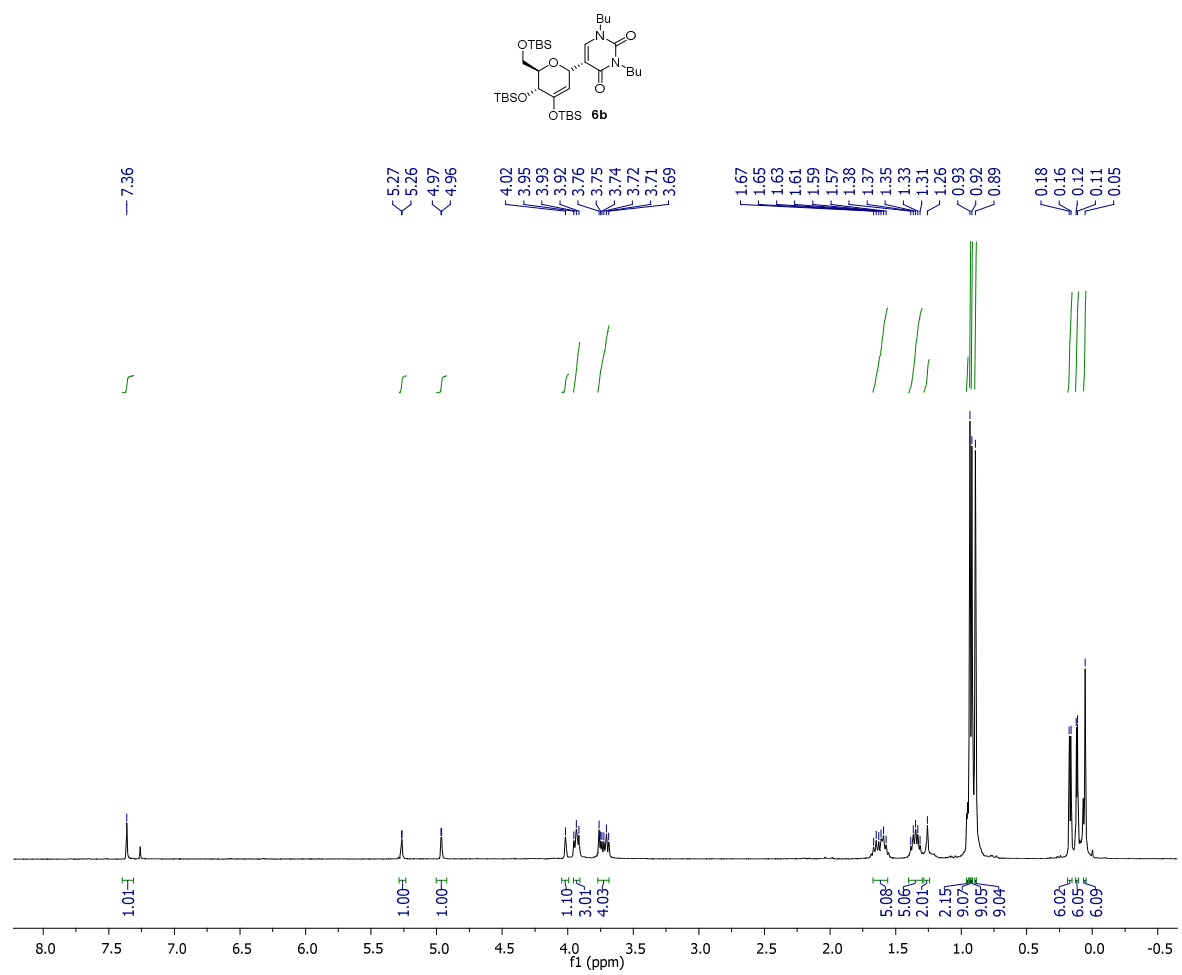

<sup>13</sup>C of 6b

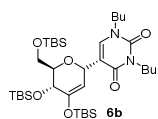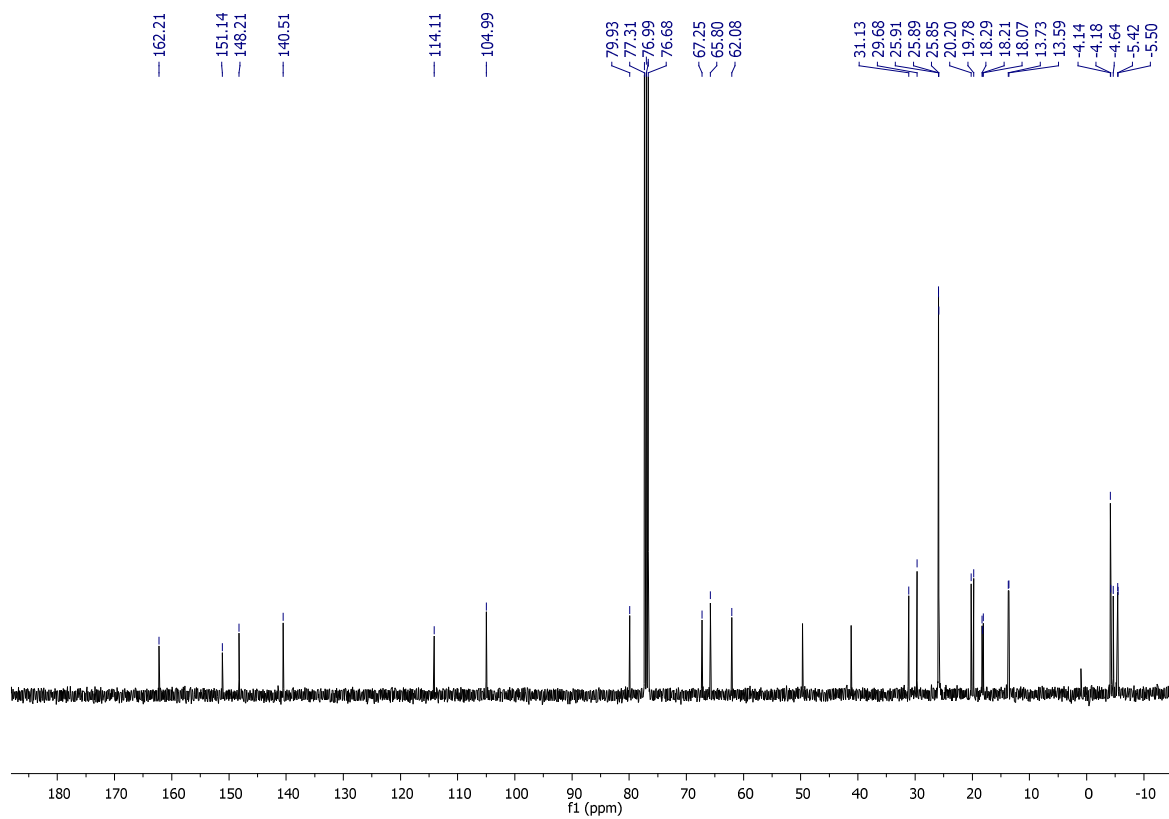

# DEPT OF 6b

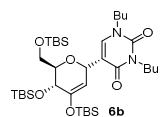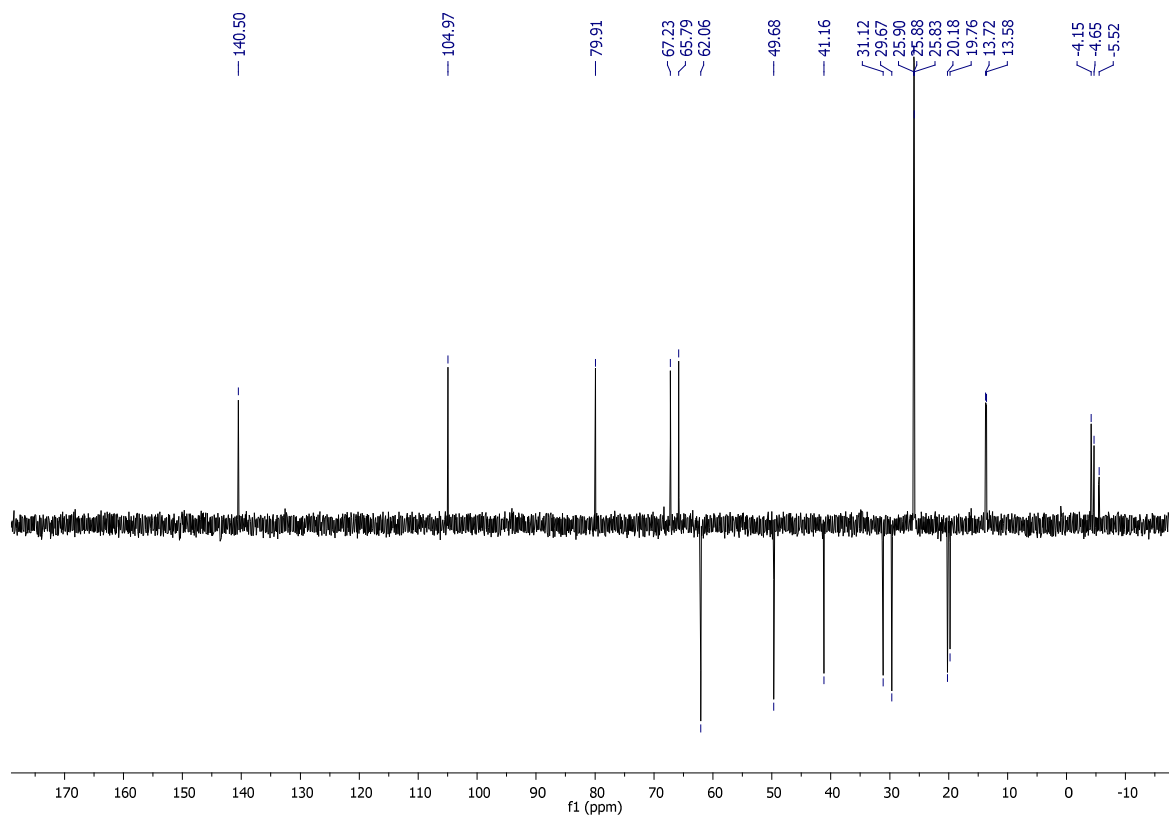

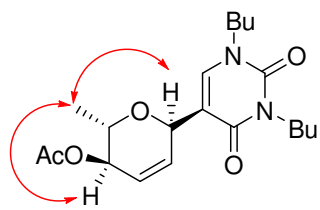

**NOESY of Compound 3a**

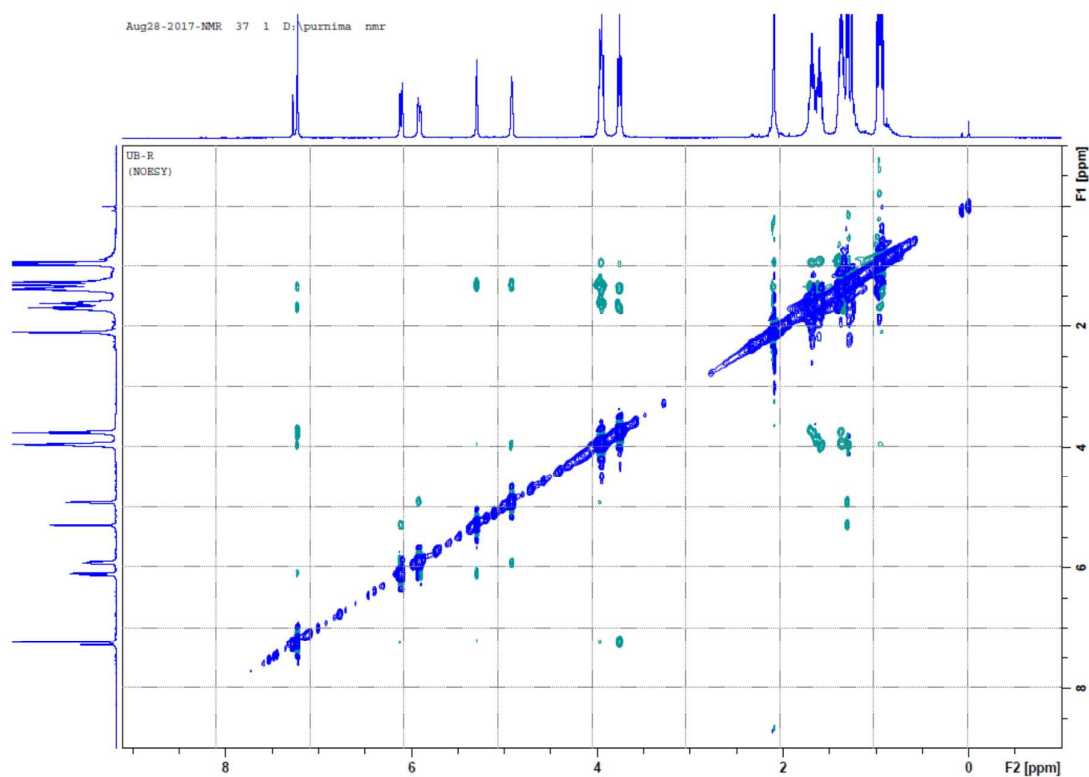

# COSY of Compound 3a

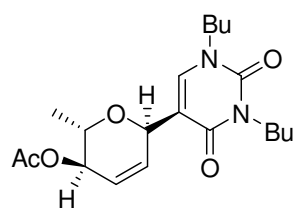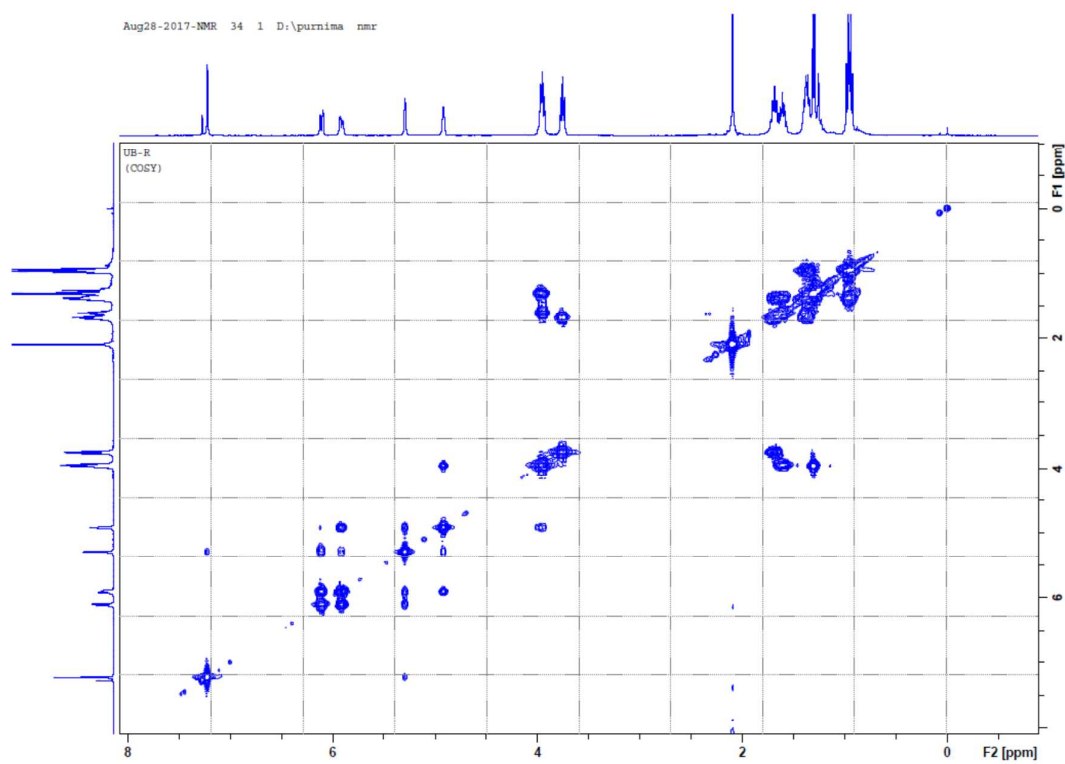

Supplement: Supplementary file 1 [file 9254965]
